# Supplementary material for: Defining the Genome Features of Escherichia albertii, an Emerging Enteropathogen Closely Related to Escherichia coli
Source: PubMed Central journal article supplement (PMC4700944; doi:10.1093/gbe/evv211), 2015-11-03
Supplement: supp_evv211_Supplemental_Tables_GBEre.pdf [file supp_evv211_Supplemental_Tables_GBEre.pdf]

Table S1. The list of *E. albertii* strains sequenced in this study and the summary of genome sequencing

| strain name  | Phylogroup of <i>E. albertii</i> | sequencing status <sup>a</sup> | total number of reads | >500 bp scaffolds | sequence redundancy | N50 scaffold length (bp) | longest scaffold length (bp) | Genome size or total length of >500 bp scaffolds (bp) | year of isolation | source <sup>b</sup>                   | contries <sup>c</sup> | intimin subtype | notes    | References | accession No.             |
|--------------|----------------------------------|--------------------------------|-----------------------|-------------------|---------------------|--------------------------|------------------------------|-------------------------------------------------------|-------------------|---------------------------------------|-----------------------|-----------------|----------|------------|---------------------------|
| CB9786       | G1                               | C                              | –                     | –                 | –                   | –                        | –                            | 4,598,983                                             | 2003              | Human, symptomatic (d)                | G                     | alpha8          |          | (1)        | AP014856                  |
| NIAH_Bird_3  | G1                               | C                              | –                     | –                 | –                   | –                        | –                            | 4,560,575                                             | 2004              | Bird ( <i>Puffinus tenuirostris</i> ) | J                     | N1.1            |          | (1)        | AP014855                  |
| EC06-170     | G2                               | C                              | –                     | –                 | –                   | –                        | –                            | 4,657,167                                             | 2006              | Human, symptomatic (NI)               | J                     | xi              |          | (1)        | AP014857                  |
| K7756        | G1                               | D                              | 4,448,778             | 53                | 120                 | 262,646                  | 547,062                      | 4,727,433                                             | 2009              | Human, symptomatic (NI)               | J                     | sigma           |          | this study | BBWC01000001-BBWC01000053 |
| NIAH_Bird_25 | G1                               | D                              | 1,528,568             | 113               | 38                  | 167,130                  | 341,925                      | 4,776,752                                             | 2006              | Bird ( <i>Passer montanus</i> )       | J                     | sigma           |          | (1)        | BBVN01000001-BBVN01000113 |
| NIAH_Bird_5  | G1                               | D                              | 3,172,674             | 106               | 80                  | 144,618                  | 383,621                      | 4,830,654                                             | 2004              | Bird ( <i>Puffinus tenuirostris</i> ) | J                     | beta3           |          | (1)        | BBVP01000001-BBVP01000106 |
| NIAH_Bird_26 | G1                               | D                              | 1,708,964             | 103               | 52                  | 240,307                  | 585,919                      | 4,710,100                                             | 2006              | Bird ( <i>Hypsipetes amaurotis</i> )  | J                     | beta3           |          | (1)        | BBVO01000001-BBVO01000103 |
| CB9791       | G1                               | D                              | 1,760,488             | 100               | 52                  | 167,119                  | 441,440                      | 4,760,418                                             | 2003              | Human, symptomatic (d)                | G                     | alpha8          |          | (1)        | BBVS01000001-BBVS01000100 |
| KU20110014   | G2                               | D                              | 1,764,634             | 111               | 50                  | 117,550                  | 382,132                      | 4,780,591                                             | 2011              | H (S [d, ap, fj])                     | J                     | sigma           | outbreak | (2)        | BBWD01000001-BBWD01000111 |
| 94389        | G2                               | D                              | 1,461,990             | 112               | 39                  | 113,364                  | 258,750                      | 4,745,744                                             | 1994              | Human, NI                             | J                     | sigma           |          | (1)        | BBVH01000001-BBVH01000112 |
| EC05-160     | G2                               | D                              | 1,755,200             | 73                | 57                  | 213,245                  | 529,418                      | 4,739,675                                             | 2005              | Human, symptomatic (NI)               | J                     | sigma           |          | (1)        | BBVW01000001-BBVW01000073 |
| NIAH_Bird_13 | G2                               | D                              | 2,617,298             | 63                | 70                  | 219,808                  | 460,906                      | 4,726,449                                             | 2005              | Bird ( <i>Hypsipetes amaurotis</i> )  | J                     | xi              |          | (1)        | BBVI01000001-BBVI01000063 |
| NIAH_Bird_24 | G2                               | D                              | 1,859,030             | 94                | 55                  | 182,032                  | 438,619                      | 4,783,301                                             | 2006              | Bird ( <i>Cyanopica cyana</i> )       | J                     | sigma           |          | (1)        | BBVM01000001-BBVM01000094 |
| NIAH_Bird_2  | G2                               | D                              | 2,608,708             | 70                | 80                  | 173,541                  | 498,643                      | 4,511,428                                             | 2002              | Bird ( <i>Sturnus cineraceus</i> )    | J                     | sigma           |          | (1)        | BBVK01000001-BBVK01000070 |
| NIAH_Bird_8  | G3                               | D                              | 2,301,508             | 167               | 65                  | 73,046                   | 218,040                      | 4,770,174                                             | 2004              | Bird ( <i>Egretta garzetta</i> )      | J                     | epsilon4        |          | (1)        | BBVQ01000001-BBVQ01000167 |
| E2675        | G3                               | D                              | 2,242,944             | 119               | 50                  | 139,498                  | 378,776                      | 4,958,535                                             | 2007              | Bird ( <i>Corvus</i> )                | J                     | N1.2            | stx2f(+) | (1)        | BBVT01000001-BBVT01000119 |
| CB10113      | G3                               | D                              | 1,994,412             | 144               | 53                  | 124,577                  | 370,016                      | 4,715,204                                             | 2004              | Cat (AC)                              | B                     | ypsilon         |          | (1)        | BBVR01000001-BBVR01000144 |
| K7744        | G3                               | D                              | 2,711,886             | 116               | 67                  | 132,486                  | 206,201                      | 4,844,216                                             | 2009              | Human, symptomatic (NI)               | J                     | jota            |          | this study | BBWB01000001-BBWB01000116 |
| EC05-81      | G3                               | D                              | 1,803,922             | 50                | 55                  | 221,444                  | 515,879                      | 4,656,922                                             | 2005              | Human, symptomatic (NI)               | J                     | N3              |          | (1)        | BBVY01000001-BBVY01000050 |
| EC03-195     | G3                               | D                              | 1,774,536             | 78                | 52                  | 285,050                  | 437,317                      | 4,853,676                                             | 2003              | Human, symptomatic (NI)               | J                     | N5              |          | (1)        | BBVV01000001-BBVV01000078 |
| NIAH_Bird_16 | G3                               | D                              | 1,702,536             | 145               | 45                  | 102,938                  | 380,167                      | 5,013,639                                             | 2005              | Bird ( <i>Passer montanus</i> )       | J                     | N1.1            |          | (1)        | BBVJ01000001-BBVJ01000145 |
| 4051-6       | G3                               | D                              | 1,525,534             | 84                | 100                 | 208,980                  | 346,931                      | 4,700,514                                             | 1989              | Human, symptomatic (d)                | B                     | omicron         |          | (1)        | BBVG01000001-BBVG01000084 |
| EC05-44      | G3                               | D                              | 1,663,840             | 43                | 57                  | 265,550                  | 608,443                      | 4,571,045                                             | 2005              | Human, symptomatic (NI)               | J                     | N4              |          | (1)        | BBVX01000001-BBVX01000043 |
| K7394        | G3                               | D                              | 3,263,926             | 59                | 77                  | 518,299                  | 353,317                      | 5,120,257                                             | 2008              | Human, symptomatic (NI)               | J                     | sigma           |          | this study | BBWA01000001-BBWA01000059 |
| NIAH_Bird_23 | G3                               | D                              | 1,819,260             | 102               | 52                  | 157,590                  | 397,573                      | 4,796,871                                             | 2006              | Bird ( <i>Phalacrocorax carbo</i> )   | J                     | epsilon1        |          | (1)        | BBVL01000001-BBVL01000102 |
| 20H38        | G3                               | D                              | 1,514,890             | 92                | 41                  | 154,251                  | 346,678                      | 4,862,440                                             | 2008              | Human, symptomatic (d)                | J                     | sigma           |          | (1)        | BBVE01000001-BBVE01000092 |
| 24           | G4                               | D                              | 10,309,770            | 137               | 224                 | 199,156                  | 315,633                      | 4,898,975                                             | 2000              | Human, symptomatic (d, ap)            | J                     | (epsilon3)      |          | (1)        | BBVF01000001-BBVF01000137 |
| EC03-127     | G4                               | D                              | 1,984,408             | 149               | 45                  | 136,933                  | 339,841                      | 4,997,600                                             | 2003              | Human, symptomatic (d)                | J                     | (epsilon3)      |          | (1)        | BBVU01000001-BBVU01000149 |
| HIPH08472    | G5                               | D                              | 9,589,256             | 85                | 235                 | 294,711                  | 686,091                      | 5,028,180                                             | 2008              | Human, symptomatic (d)                | J                     | N2              | stx2f(+) | (1)        | BBVZ01000001-BBVZ01000085 |

Ref. 1; Ooka T, et al. (2012) Clinical significance of *Escherichia albertii*. Emerg Infect Dis 18(3):488-492.Ref. 2; Ooka T, et al. (2013) Human gastroenteritis outbreak associated with *Escherichia albertii*, Japan. Emerg Infect Dis 19(1):144-146.<sup>a</sup> C: complete, D: draft<sup>b</sup> Symptoms of the patients, from which each clinical strain was isolated, are indicated in parentheses (d: diarrhea, ap: abdominal pain, f: fever, NI: no information).<sup>c</sup> G: Germany, B: Brazil, J: Japan

Table S2. *E. coli*, *E. fergusonii* and *E. albertii* strains used for comparative genome analysis  
Completely sequenced strains

| Strain                  | Phylogroup           | Pathotype <sup>b</sup> | Serotype <sup>b</sup> | Chromosome |                   |      |                  | Plasmids        |                   |                       | total numbers of CDSs | Reference   |
|-------------------------|----------------------|------------------------|-----------------------|------------|-------------------|------|------------------|-----------------|-------------------|-----------------------|-----------------------|-------------|
|                         |                      |                        |                       | Size (kb)  | CDSs <sup>a</sup> | tRNA | Accession number | Size (kb)       | CDSs <sup>a</sup> | Accession number      |                       |             |
| O55_CB9615 <sup>c</sup> | E                    | EHEC                   | O55:H7                | 5,386      | 5,014             | 100  | CP001846         | 66              | 107               | CP001847              | 5,121                 | (1)         |
| O55_RM12579             | E                    | EHEC                   | O55:H7                | 5,264      | 4,912             | 102  | CP003109         | 94/66/12/6/6    | 216               | CP003110-14           | 5,128                 | (2)         |
| O157_Sakai <sup>c</sup> | E                    | EHEC                   | O157:H7               | 5,498      | 5,363 (247)       | 105  | BA000007         | 93/3            | 95 (11)           | AB011548-9            | 4,807                 | (3)         |
| O157_TW14359            | E                    | EHEC                   | O157:H7               | 5,528      | 5,263             | 106  | CP001368         | 95              | 110               | CP001369              | 5,373                 | (4)         |
| O157_EDL933             | E                    | EHEC                   | O157:H7               | 5,528      | 5,349             | 98   | AE005174         | 92              | 100               | AF074613              | 5,449                 | (5)         |
| O157_EC4115             | E                    | EHEC                   | O157:H7               | 5,572      | 5,315             | 110  | CP001164         | 95/37           | 162               | CP001163, 11655       | 5,477                 | (6)         |
| O157_Xuzhou21           | E                    | EHEC                   | O157:H7               | 5,386      | 5,039             | 93   | CP001925         | 92/38           | 144               | CP001926-7            | 5,183                 | (7)         |
| UMNK88                  | A                    | porcine ETEC           | NI                    | 5,186      | 5,118             | 96   | CP002729         | 161/91/82/81/66 | 490               | CP002730-33, HQ023862 | 5,608                 | unpublished |
| H10407                  | A                    | ETEC                   | O78                   | 5,153      | 4,763             | 89   | FN649414         | 95/67/6/5/5     | 249               | FN649415-8            | 5,012                 | (16)        |
| MG1655 <sup>c</sup>     | A                    | laboratory             | -                     | 4,639      | 4,294 (101)       | 88   | U00096           | -               | -                 | -                     | 4,033                 | (26)        |
| P12b                    | A                    | NI                     | NI                    | 4,935      | 4,393             | 83   | CP002291         | -               | -                 | -                     | 4,393                 | (17)        |
| ATCC8739                | A                    | NI                     | NI                    | 4,746      | 4,200             | 87   | CP000946         | -               | -                 | -                     | 4,200                 | unpublished |
| HS <sup>c</sup>         | A                    | commensal              | O9                    | 4,643      | 4,478 (94)        | 88   | CP000802         | -               | -                 | -                     | 4,248                 | (10)        |
| APECO78                 | B1                   | APEC                   | O78                   | 4,798      | 4,589             | 88   | CP004009         | -               | -                 | -                     | 4,589                 | unpublished |
| O26_11368 <sup>c</sup>  | B1                   | EHEC                   | O26:H11               | 5,697      | 5,609 (254)       | 101  | AP010953         | 85/63/6/4       | 186 (31)          | AP010954-7            | 4,946                 | (8)         |
| O111_11128              | B1                   | EHEC                   | O111:H-               | 5,371      | 5,264 (291)       | 106  | AP010960         | 205/98/78/8/7   | 468 (33)          | AP010961-5            | 4,965                 | (8)         |
| O103_12009              | B1                   | EHEC                   | O103:H2               | 5,449      | 5,264             | 98   | AP010958         | 72              | 90                | AP010959              | 5,336                 | (8)         |
| IA11                    | B1                   | commensal              | O8                    | 4,701      | 4,491 (51)        | 94   | CU928160         | -               | -                 | -                     | 4,267                 | (25)        |
| SE11 <sup>c</sup>       | B1                   | commensal              | O152:H28              | 4,888      | 4,679             | 86   | AP009240         | 100/91/61/7/5/4 | 323               | AP009241-6            | 4,821                 | (11)        |
| 2009EL-2050             | B1                   | EAEC/EHEC              | O104:H4               | 5,253      | 4,970             | 95   | CP003297         | 109/74/2        | 213               | CP003298-3300         | 5,183                 | (20)        |
| 2009EL-2071             | B1                   | EAEC/EHEC              | O104:H4               | 5,313      | 5,040             | 99   | CP003301         | 76/2            | 86                | CP003302-3            | 5,126                 | (20)        |
| 2011C-3493              | B1                   | EAEC/EHEC              | O104:H4               | 5,273      | 4,975             | 94   | CP003289         | 89/74/2         | 175               | CP003290-2            | 5,150                 | (20)        |
| 55989                   | B1                   | EAEC                   | O104:H4               | 5,155      | 4,969 (79)        | 86   | CU928145         | 72              | 100 (7)           | CU928159              | 4,635                 | (25)        |
| KO11FL                  | B1                   | laboratory             | NI                    | 5,021      | 4,697             | 85   | CP002970         | 5               | 12                | CP002971              | 4,709                 | (23)        |
| E24377A                 | B1                   | ETEC                   | O139:H28              | 4,979      | 4,873 (118)       | 91   | CP000800         | 79/74/70/34/6/5 | 242 (34)          | CP000795-9, 801       | 4,760                 | (10)        |
| 042 <sup>c</sup>        | D                    | EAEC                   | O44:H18               | 5,242      | 4,810             | 93   | FN554766         | 113             | 152               | FN554767              | 4,962                 | (14)        |
| UMN026 <sup>c</sup>     | D                    | ExPEC                  | O17:K52:H18           | 5,202      | 4,918 (45)        | 88   | CU928163         | 122/34          | 198 (8)           | CU928148-9            | 4,867                 | (25)        |
| IA139                   | D                    | ExPEC                  | O7:K1                 | 5,132      | 4,906 (80)        | 88   | CU928164         | -               | -                 | -                     | 4,432                 | (25)        |
| CE10                    | D                    | ExPEC                  | O7:K1:NM              | 5,314      | 5,009             | 91   | CP003034         | 54/5/4/1        | 71                | CP003035-8            | 5,080                 | (9)         |
| SMS-3-5                 | D                    | environment            | O19:H34               | 5,068      | 4,743             | 90   | CP000970         | 130/9/4/3       | 170               | CP000971-4            | 4,913                 | (13)        |
| E2348/69 <sup>c</sup>   | B2                   | EPEC                   | O127:H6               | 4,965      | 4,703 (145)       | 92   | FM180568         | 97/6            | 121 (23)          | FM180569-70           | 4,497                 | (27)        |
| 536                     | B2                   | ExPEC                  | O6:K15:H7             | 4,938      | 4,685             | 81   | CP000247         | -               | -                 | -                     | 4,457                 | (29)        |
| NRG857C                 | B2                   | AIEC                   | O83:H1                | 4,748      | 4,429             | 84   | CP001855         | 147             | 153               | CP001856              | 4,582                 | (15)        |
| LF82                    | B2                   | AIEC                   | NI                    | 4,773      | 4,376             | 84   | CU651637         | -               | -                 | -                     | 4,376                 | unpublished |
| ABU_83972               | B2                   | commensal              | NI                    | 5,131      | 4,793             | 88   | CP001671         | 2               | 3                 | CP001833              | 4,795                 | (24)        |
| CFT073                  | B2                   | ExPEC                  | O6:K2:H1              | 5,231      | 5,473 (94)        | 89   | AE14075          | -               | -                 | -                     | 5,101                 | (28)        |
| ED1a                    | B2                   | commensal              | O81                   | 5,210      | 5,129 (95)        | 91   | CU928162         | 120             | 150 (11)          | CU928147              | 4,634                 | (25)        |
| UM146                   | B2                   | AIEC                   | NI                    | 4,993      | 4,650             | 86   | CP002167         | 115             | 133               | CP002168              | 4,783                 | (22)        |
| UTI89                   | B2                   | ExPEC                  | -                     | 5,065      | 5,066             | 88   | CP000243         | 114             | 145               | CP000244              | 5,073                 | (30)        |
| IHE3034                 | B1                   | ExPEC                  | O18:K1:H7             | 5,108      | 4,757             | 97   | CP001969         | -               | -                 | -                     | 4,757                 | (21)        |
| APEC O1                 | B2                   | ExPEC                  | O1:K1:H7              | 5,082      | 4,467             | 94   | CP000468         | 241/174         | 423               | DQ517526, DQ381420    | 4,730                 | (19)        |
| S88                     | B2                   | ExPEC                  | O45:K1:H7             | 5,032      | 4,859 (90)        | 91   | CU928161         | 134             | 144 (9)           | CU928146              | 4,666                 | (25)        |
| SE15 <sup>c</sup>       | B2                   | commensal              | O150:H5               | 4,717      | 4,338             | 84   | AP009378         | 122             | 150               | AP009379              | 4,488                 | (12)        |
| NA114                   | B2                   | ExPEC                  | O25                   | 4,971      | 4,873             | 79   | CP002797         | -               | -                 | -                     | 4,873                 | (18)        |
| ATCC35469 <sup>c</sup>  | <i>E. fergusonii</i> |                        | -                     | 4,655      | 4,319             | 87   | CU928158         | 55              | 58                | CU928144              | 4,377                 | unpublished |
| KF1                     | <i>E. albertii</i>   |                        | NI                    | 4,702      | 4,422             | 85   | CP007025         | -               | -                 | -                     | -                     | (31)        |

## Draft-sequences

| Strain                            | Species or clades    | Pathotype <sup>b</sup> | Total length (kb) | Sequencing platform <sup>b</sup> | Sequence redundancy <sup>b</sup> | N50 length (bp) <sup>b</sup> | Accession number                                            |
|-----------------------------------|----------------------|------------------------|-------------------|----------------------------------|----------------------------------|------------------------------|-------------------------------------------------------------|
| NBRC 107761                       | <i>E. albertii</i>   | diarrheic              | 4,422             | Illumina                         | 150                              | 29,757                       | BBMY00000000                                                |
| TW07627                           | <i>E. albertii</i>   | diarrheic              | 4,747             | Roche454                         | 23                               | 395,133                      | ABKX00000000                                                |
| TW08933                           | <i>E. albertii</i>   | NI                     | 4,513             | Illumina                         | 600                              | 27,943                       | AEJU00000000<br>directly collect<br>from Broad<br>institute |
| B156                              | <i>E. albertii</i>   | avirulent              | 4,996             | NI                               | NI                               | NI                           | NI                                                          |
| TW10509 <sup>c</sup>              | CC-I                 | ETEC                   | 5,191             | Illumina                         | 600                              | 27,634                       | AEKA00000000                                                |
| TW09276 <sup>c</sup>              | CC-III               | avirulent              | 4,473             | Illumina                         | 600                              | 28,680                       | AEJV00000000<br>directly collect<br>from Broad<br>institute |
| H605 <sup>c</sup>                 | CC-IV                | avirulent              | 4,482             | NI                               | NI                               | NI                           | NI                                                          |
| E1118 <sup>c</sup>                | CC-V                 | avirulent              | 4,617             | NI                               | NI                               | NI                           | NI                                                          |
| KTE11 <sup>c</sup>                | CC-V                 | NI                     | 4,527             | Illumina                         | 261                              | 229,669                      | ANSR00000000                                                |
| KTE96 <sup>c</sup>                | CC-V                 | NI (human)             | 4,608             | Illumina                         | 130                              | 229,293                      | ASVD00000000                                                |
| KTE114 <sup>c</sup>               | CC-III               | NI                     | 4,754             | Illumina                         | 142                              | 515,979                      | ASTS00000000                                                |
| KTE31 <sup>c</sup>                | CC-III               | NI                     | 4,557             | Illumina                         | 141                              | 454,369                      | ASTZ00000000                                                |
| KTE159 <sup>c</sup>               | CC-V                 | NI                     | 4,810             | Illumina                         | 136                              | 192,611                      | ASVR00000000                                                |
| KTE52 <sup>c</sup>                | CC-V /<br>CC-V /     | NI                     | 4,648             | Illumina                         | 135                              | 157,654                      | ASUT00000000                                                |
| HT073016 <sup>c</sup><br>GIA-173- | <i>E. marmotae</i>   | NI                     | 4,506             | Illumina                         | 100                              | 44,977                       | JNBP00000000                                                |
| 4-RBA-P5 <sup>c</sup>             | <i>E. fergusonii</i> | NI                     | 4,764             | Illumina                         | 31                               | 268,310                      | JZWQ00000000                                                |
| B253 <sup>c</sup>                 | <i>E. fergusonii</i> | NI                     | 4,776             | Roche454                         | 34                               | 284,983                      | AEIA00000000                                                |
| ECD227 <sup>c</sup><br>GIA-274-   | <i>E. fergusonii</i> | NI                     | 4,866             | Roche454                         | 18                               | 156,910                      | AEVY00000000                                                |
| 5-RBA-P2 <sup>c</sup>             | <i>E. fergusonii</i> | NI                     | 4,495             | Illumina                         | 23                               | 298,179                      | JZWN00000000                                                |

<sup>a</sup> Total numbers of CDSs including pseudogenes are shown. Numbers of pseudogenes are indicated in parentheses if available.

<sup>b</sup> NI: no information

<sup>c</sup> These strains were used for ANI analysis.

References are:

- Zhou Z, et al. (2010) Derivation of *Escherichia coli* O157:H7 from its O55:H7 precursor. Plos ONE 5(1):E8700.
- Kyle JL, et al. (2012) *Escherichia coli* Serotype O55:H7 Diversity Supports Parallel Acquisition of Bacteriophage at Shiga Toxin Phage Insertion Sites during Evolution of the O157:H7 Lineage. J Bacteriol 194(8):1885-1896.
- Hayashi T, et al. (2001) Complete genome sequence of enterohemorrhagic *Escherichia coli* O157:H7 and genomic comparison with a laboratory strain K-12. DNA Res 8(1):11-22.
- Kulasekara BR, et al. (2009) Analysis of the genome of the *Escherichia coli* O157:H7 2006 spinach-associated outbreak isolate indicates candidate genes that may enhance virulence. Infect Immun 77(9):3713-3721.
- Perna NT, et al. (2001) Genome sequence of enterohaemorrhagic *Escherichia coli* O157:H7. Nature 409(6819):529-533.
- Eppinger M, et al. (2011) Genomic anatomy of *Escherichia coli* O157:H7 outbreaks. Proc Natl Acad Sci U S A 108(50):20142-20147.
- Xiong Y, et al. (2012) A Novel *Escherichia coli* O157:H7 Clone Causing a Major Hemolytic Uremic Syndrome Outbreak in China. Plos ONE 7(4):E36144.
- Ogura Y, et al. (2009) Comparative genomics reveal the mechanism of the parallel evolution of O157 and non-O157 enterohemorrhagic *Escherichia coli*. Proc Natl Acad Sci U S A 106 (42):17939-17944.
- Lu S, et al. (2011) Complete Genome Sequence of the Neonatal-Meningitis-Associated *Escherichia coli* Strain CE10. J Bacteriol 193(24):7005.
- Rasko DA, et al. (2008) The pangenome structure of *Escherichia coli*: comparative genomic analysis of *E. coli* commensal and pathogenic isolates. J Bacteriol 190(20):6881-6893.
- Oshima K, et al. (2008) Complete genome sequence and comparative analysis of the wild-type commensal *Escherichia coli* strain SE11 isolated from a healthy adult. DNA Res 15(6):375-386.
- Toh H. (2010) Complete genome sequence of the wild-type commensal *Escherichia coli* strain SE15, belonging to phylogenetic group B2. J Bacteriol 192(4):1165-1166.
- Fricke WF, et al. (2008) Insights into the environmental resistance gene pool from the genome sequence of the multidrug-resistant environmental isolate *Escherichia coli* SMS-3-5. J Bacteriol 190(20):6779-6794.
- Chaudhuri RR, et al. (2010) Complete Genome Sequence and Comparative Metabolic Profiling of the Prototypical Enteraggregative *Escherichia coli* Strain 042. Plos One 5(1):e8801.
- Nash JH, et al. (2010) Genome sequence of adherent-invasive *Escherichia coli* and comparative genomic analysis with other *E. coli* pathotypes. BMC Genomics 11(1):667.
- Crossman LC, et al. (2010) A commensal gone bad: complete genome sequence of the prototypical enterotoxigenic *Escherichia coli* strain H10407. J Bacteriol 192(21):5822-5831.

17. Liu B, et al. (2012) A novel non-homologous recombination-mediated mechanism for *Escherichia coli* unilateral flagellar phase variation. *Nucleic Acids Res* 40(10):4530-4538.
18. Avasthi TS, et al. (2011) Genome of Multidrug-Resistant Uropathogenic *Escherichia coli* Strain NA114 from India. *J Bacteriol* 193(16):4272-4273.
19. Johnson TJ, et al. (2007) The genome sequence of avian pathogenic *Escherichia coli* strain O1:K1:H7 shares strong similarities with human extraintestinal pathogenic *E. coli* genomes. *J Bacteriol* 189(8):3228-3236.
20. Ahmed SA, et al. (2012) Genomic Comparison of *Escherichia coli* O104:H4 Isolates from 2009 and 2011 Reveals Plasmid, and Prophage Heterogeneity, Including Shiga Toxin Encoding Phage stx2. *PLoS ONE* 7(11):E48228.
21. Moriel DG, et al. (2010) Identification of protective and broadly conserved vaccine antigens from the genome of extraintestinal pathogenic *Escherichia coli*. *Proc Natl Acad Sci U S A* 107(20):9072-9077.
22. Krause DO, et al. (2010) Complete genome sequence of adherent invasive *Escherichia coli* UM146 isolated from ileal Crohn's disease biopsy tissue. *J Bacteriol* 193(2):583.
23. Turner PC, et al. (2012) Optical mapping and sequencing of the *Escherichia coli* KO11 genome reveal extensive chromosomal rearrangements, and multiple tandem copies of the *Zymomonas mobilis pdc* and *adhB* genes. *J Ind Microbiol Biotechnol* 39(4):629-639.
24. Zdziarski J, et al. (2010) Host imprints on bacterial genomes--rapid, divergent evolution in individual patients. *PLoS Pathog* 6(8):e1001078.
25. Touchon M, et al. (2009) Organised genome dynamics in the *Escherichia coli* species results in highly diverse adaptive paths. *PLoS Genet* 5(1):e1000344.
26. Blattner FR, et al. (1997) The complete genome sequence of *Escherichia coli* K-12. *Science* 277(5331):1453-1474 .
27. Iguchi A, et al. (2008) The complete genome sequence and comparative genome analysis of enteropathogenic *E. coli* O127:H6 strain E2348/69. *J Bacteriol* 191(1):347-354.
28. Welch RA, et al. (2002) Extensive mosaic structure revealed by the complete genome sequence of uropathogenic *Escherichia coli*. *Proc Natl Acad Sci U S A* 99(26):17020-17024.
29. Brzuszkiewicz E, et al. (2006) How to become a uropathogen: comparative genomic analysis of extraintestinal pathogenic *Escherichia coli* strains. *Proc Natl Acad Sci U S A* 103(34):12879-12884.
30. Chen SL, et al. (2006) Identification of genes subject to positive selection in uropathogenic strains of *Escherichia coli*: a comparative genomics approach. *Proc Natl Acad Sci U S A* 103(15):5977-5982.
31. Fiedoruk K, et al. (2014) First Complete Genome Sequence of *Escherichia albertii* Strain KF1, a New Potential Human Enteric Pathogen. *Genome announc* 2(1):e00004-14.

Table S3. Prophages and integrative elements of strains CB9786, NIAH\_Bird\_3 and EC06-170

| Name                        | Position (start) | Position (end) | Length (bp) | Integration site     | Length of attL/R (bp) | Type/ feature | Virulence-related genes and other notable genes                                                                                                                                                                            |
|-----------------------------|------------------|----------------|-------------|----------------------|-----------------------|---------------|----------------------------------------------------------------------------------------------------------------------------------------------------------------------------------------------------------------------------|
| <b>CB9786</b>               |                  |                |             |                      |                       |               |                                                                                                                                                                                                                            |
| <b>Prophages</b>            |                  |                |             |                      |                       |               |                                                                                                                                                                                                                            |
| EACB_P01                    | 267083           | 307492         | 40410       | tRNA ( <i>thrW</i> ) | 47                    | lambda-like   | <i>bor</i>                                                                                                                                                                                                                 |
| EACB_P02                    | 864592           | 899708         | 35117       | <i>rcdA</i>          | 25                    | P2-like       |                                                                                                                                                                                                                            |
| EACB_P03                    | 961411           | 991516         | 30106       | <i>pflA-pflB</i>     | 13                    | P2-like       |                                                                                                                                                                                                                            |
| EACB_P04                    | 1059619          | 1101689        | 42071       | tRNA ( <i>serT</i> ) | 65                    | lambda-like   | <i>nleG</i> -family protein, hydrolase, <i>ompT</i>                                                                                                                                                                        |
| EACB_P05                    | 2033614          | 2081175        | 47562       | <i>yegD-mdtA</i>     | ND                    | lambda-like   | <i>lom</i> , 3 <i>nleG</i> -family proteins, <i>nleA/EspI</i> -homolog                                                                                                                                                     |
| EACB_P06                    | 2578454          | 2619827        | 41374       | <i>yfhH-yfhL</i>     | 18                    | P2-like       |                                                                                                                                                                                                                            |
| EACB_P07                    | 4523112          | 4568340        | 45229       | <i>yjiG-prfC</i>     | 14                    | lambda-like   | <i>lom</i>                                                                                                                                                                                                                 |
| <b>Integrative elements</b> |                  |                |             |                      |                       |               |                                                                                                                                                                                                                            |
| EACB_IE01                   | 307540           | 320111         | 12572       | tRNA ( <i>thrW</i> ) | 20                    |               |                                                                                                                                                                                                                            |
| EACB_IE02                   | 1244455          | 1258743        | 14289       | <i>icd-minE</i>      | ND                    |               | <i>nleG</i> -family protein, hydrolase, <i>ompT</i> , predicted adhesin-like autotransporter                                                                                                                               |
| EACB_IE03                   | 1403363          | 1410580        | 7218        | <i>sapC-sapB</i>     | 11                    |               | <i>emrE</i> , hydrolase                                                                                                                                                                                                    |
| EACB_IE04                   | 1960346          | 1964043        | 3698        | tRNA ( <i>asnV</i> ) | 15                    |               |                                                                                                                                                                                                                            |
| EACB_IE05                   | 3039917          | 3062761        | 22845       | tRNA ( <i>pheV</i> ) | ND                    |               |                                                                                                                                                                                                                            |
| EACB_IE06                   | 3762095          | 3781365        | 19271       | tRNA ( <i>selC</i> ) | ND                    |               |                                                                                                                                                                                                                            |
| EACB_IE07                   | 4277029          | 4319065        | 42037       | tRNA ( <i>pheU</i> ) | ND                    | LEE           | T3SS machinery, <i>ibe</i> , <i>espG</i> , <i>espZ</i> , <i>espH</i> , <i>map</i> , <i>tir</i> , <i>espB</i> , <i>espF</i> , <i>espM</i> -homolog, <i>nleG</i> -family protein, <i>espK</i> -homolog, <i>espO</i> -homolog |
| EACB_IE08                   | 4455929          | 4473494        | 17566       | tRNA ( <i>leuX</i> ) | ND                    |               | <i>nleG</i> -family protein, autotransporter serine protease                                                                                                                                                               |
| <b>NIAH_Bird_3</b>          |                  |                |             |                      |                       |               |                                                                                                                                                                                                                            |
| <b>Prophages</b>            |                  |                |             |                      |                       |               |                                                                                                                                                                                                                            |
| EANB_P01                    | 839729           | 874899         | 35171       | <i>rcdA</i>          | 25                    | P2-like       |                                                                                                                                                                                                                            |
| EANB_P02                    | 1874934          | 1923648        | 48715       | tRNA ( <i>serU</i> ) | 32                    | lambda-like   | tRNA(Gly [TCC], Thr [TGT], Met [CAT]), <i>espJ</i> -homolog <sup>a</sup> , <i>tccP2</i> -homolog, <i>nleC</i> -homolog, <i>asnY</i> -homolog, <i>nleG</i> -family protein                                                  |
| EANB_P03                    | 3701451          | 3712143        | 10693       | tRNA ( <i>selC</i> ) | 23                    | P4-like       |                                                                                                                                                                                                                            |
| EANB_P04                    | 4004256          | 4036901        | 32646       | <i>cpxP-fieF</i>     | 47                    | P2-like       |                                                                                                                                                                                                                            |
| <b>Integrative elements</b> |                  |                |             |                      |                       |               |                                                                                                                                                                                                                            |
| EANB_IE01                   | 1161789          | 1180078        | 18290       | <i>icd-minE</i>      | ND                    |               | <i>nleG</i> -family protein, hydrolase, <i>ompT</i> , predicted adhesin-like autotransporter                                                                                                                               |
| EANB_IE02                   | 1325385          | 1332602        | 7218        | <i>sapC-sapB</i>     | 11                    |               | <i>emrE</i> , hydrolase                                                                                                                                                                                                    |
| EANB_IE03                   | 1932359          | 1944540        | 12182       | tRNA ( <i>asnT</i> ) | 20                    |               |                                                                                                                                                                                                                            |
| EANB_IE04                   | 1949743          | 1953442        | 3700        | tRNA ( <i>asnU</i> ) | 15                    |               |                                                                                                                                                                                                                            |
| EANB_IE05                   | 3712144          | 3732112        | 19969       | tRNA ( <i>asnU</i> ) | ND                    |               | predicted adhesin                                                                                                                                                                                                          |
| EANB_IE06                   | 4288430          | 4328536        | 40107       | tRNA ( <i>pheU</i> ) | ND                    | LEE           | T3SS machinery, <i>ibe</i> , <i>espG</i> , <i>espZ</i> , <i>espH</i> , <i>map</i> , <i>tir</i> , <i>espB</i> , <i>espF</i> , <i>espM</i> -homolog, <i>nleG</i> -family protein, <i>espK</i> -homolog, <i>espO</i> -homolog |
| EANB_IE07                   | 4467038          | 4478895        | 11858       | tRNA ( <i>leuX</i> ) | ND                    |               | <i>nleB</i> , <i>nleE</i> , <i>nleG</i> -family protein, autotransporter serine protease                                                                                                                                   |
| <b>EC06-170</b>             |                  |                |             |                      |                       |               |                                                                                                                                                                                                                            |
| <b>Prophages</b>            |                  |                |             |                      |                       |               |                                                                                                                                                                                                                            |
| EAEC_P01                    | 878587           | 913183         | 34597       | <i>rcdA</i>          | 20                    | P2-like       |                                                                                                                                                                                                                            |
| EAEC_P02                    | 1323565          | 1366341        | 42777       | <i>ompW-trpA</i>     | 20                    | lambda-like   | tRNA(Thr [TGT], Gly [TCC]), 3 <i>nleG</i> -family proteins, <i>espW</i> -homolog <sup>a</sup> , <i>asnM</i> -homolog                                                                                                       |
| EAEC_P03                    | 1971394          | 2020333        | 48940       | tRNA ( <i>serU</i> ) | 13                    | lambda-like   | tRNA(Gly [TCC], Thr [TGT], Met [CAT]), <i>espJ</i> -homolog <sup>a</sup> , <i>tccP2</i> -homolog, <i>nleC</i> -homolog, <i>asnY</i> -homolog, <i>nleG</i> -family protein                                                  |
| EAEC_P04                    | 2105356          | 2141946        | 36591       | <i>yegD-mdtA</i>     | 34                    | lambda-like   | <i>lom</i> , <i>nleG</i> -homolog, <i>nleA/EspI</i> -homolog                                                                                                                                                               |
| EAEC_P05                    | 4231127          | 4278354        | 47228       | <i>zur-dusA</i>      | 8                     | lambda-like   | tRNA(Met [CAT], Thr [TGT], Gly [TCC]), <i>lom</i> , 4 <i>nleG</i> -family proteins, <i>asnW</i> -homolog <sup>a</sup> , <i>asnM</i> -homolog                                                                               |
| <b>Integrative elements</b> |                  |                |             |                      |                       |               |                                                                                                                                                                                                                            |
| EAEC_IE01                   | 334779           | 347190         | 12412       | tRNA ( <i>thrW</i> ) | 14                    |               |                                                                                                                                                                                                                            |
| EAEC_IE02                   | 1201236          | 1215636        | 14401       | <i>icd-minE</i>      | ND                    |               | <i>nleG</i> -family protein, hydrolase, <i>ompT</i> , predicted adhesin-like autotransporter                                                                                                                               |
| EAEC_IE03                   | 1410655          | 1417872        | 7218        | <i>sapC-sapB</i>     | 11                    |               | <i>emrE</i> , hydrolase                                                                                                                                                                                                    |
| EAEC_IE04                   | 2177894          | 2185543        | 7650        | <i>thiM-rcnR</i>     | 81                    |               |                                                                                                                                                                                                                            |
| EAEC_IE05                   | 3802021          | 3820660        | 18640       | tRNA ( <i>selC</i> ) | ND                    |               | predicted adhesin                                                                                                                                                                                                          |
| EAEC_IE06                   | 4360568          | 4401000        | 40433       | tRNA ( <i>pheU</i> ) | ND                    | LEE           | T3SS machinery, <i>ibe</i> , <i>espG</i> , <i>espZ</i> , <i>espH</i> , <i>map</i> , <i>tir</i> , <i>espB</i> , <i>espF</i> , <i>espM</i> -homolog, <i>nleG</i> -family protein, <i>espK</i> -homolog, <i>espO</i> -homolog |
| EAEC_IE07                   | 4536404          | 4566214        | 22225       | tRNA ( <i>leuX</i> ) | ND                    |               | <i>nleG</i> -family protein, autotransporter serine protease                                                                                                                                                               |

ND: not detected

<sup>a</sup>: pseudogene

Table S4. IS elements of the three *E. albertii* strains completely sequenced in this study

| IS element                | Number of copies <sup>a</sup> |             |          |
|---------------------------|-------------------------------|-------------|----------|
|                           | CB9786                        | NIAH_Bird_3 | EC06-170 |
| IS421                     | 2                             | 2           | 0        |
| ISEc1                     | 1                             | 2 (1)       | 1        |
| IS911                     | 0                             | 0           | 4        |
| ISEa1 <sup>b</sup>        | 1                             | 0           | 0        |
| ISL3-family IS element 1  | 1 (1)                         | 0           | 0        |
| ISL3-family IS element 2  | 1 (1)                         | 2           | 0        |
| ISAs1-family IS element 1 | 1 (1)                         | 0           | 0        |
| ISAs1-family IS element 2 | 1 (1)                         | 1 (1)       | 0        |
| ISAs1-family IS element 3 | 0                             | 0           | 1 (1)    |
| ISAs1-family IS element 4 | 0                             | 0           | 1 (1)    |
| ISAs1-family IS element 5 | 0                             | 0           | 2 (1)    |
| ISAs1-family IS element 6 | 0                             | 0           | 1 (1)    |
| ISAs1-family IS element 7 | 0                             | 0           | 1        |
| total                     | 8 (4)                         | 7 (2)       | 11 (4)   |

<sup>a</sup> Numbers of truncated or degraded copies are shown in parentheses.

<sup>b</sup> Newly identified IS elements.

Table S5A. *Escherichia albertii*-specific CDSs that are highly conserved in *E. albertii* but are absent or divergent in sequence in other *Escherichia* species/clades

| Locus tag<br>of CB9786 | product                                                                  | amino acid |                                                                                    |
|------------------------|--------------------------------------------------------------------------|------------|------------------------------------------------------------------------------------|
|                        |                                                                          | length     | note <sup>a</sup>                                                                  |
| EACBF0116              | predicted protein                                                        | 86         | no homologues in <i>E. coli</i>                                                    |
| EACBF0348              | predicted protein                                                        | 188        | no homologues in <i>E. coli</i>                                                    |
| EACBF0407              | predicted protein                                                        | 506        | no homologues in <i>E. coli</i>                                                    |
| EACBF0500              | predicted fimbrial-like adhesin protein                                  | 180        | homolog (75% ID/99% LC) present in 29 <i>E. coli</i> strains                       |
| EACBF0504              | predicted fimbrial-like adhesin protein                                  | 172        | homolog (72-78% ID/99% LC) present in 30 <i>E. coli</i> strains                    |
| EACBF0506              | predicted protein                                                        | 163        | no homologues in <i>E. coli</i>                                                    |
| EACBF0528              | GNAT family acetyltransferase                                            | 234        | no homologues in <i>E. coli</i>                                                    |
| EACBF0679              | predicted protein                                                        | 314        | homolog (63-65% ID/100% LC) present in 13 <i>E. coli</i> strains                   |
| EACBF0741              | predicted protein                                                        | 118        | homolog (66% ID/95% LC) present only in <i>E. coli</i> strain 042                  |
| EACBF1075              | predicted protein                                                        | 389        | no homologues in <i>E. coli</i>                                                    |
| EACBF1099              | predicted protein                                                        | 103        | homolog (65-67% ID/99% LC) present in 43 <i>E. coli</i> strains                    |
| EACBF1192              | putative outer membrane protease                                         | 315        | homolog (77% ID/100% LC) present in 29 <i>E. coli</i> strains                      |
| EACBF1240              | predicted cytoplasmic protein                                            | 376        | homolog (69-72% ID/97-99% LC) present in 18 <i>E. coli</i> strains                 |
| EACBF1245              | predicted protein                                                        | 345        | no homologues in <i>E. coli</i>                                                    |
| EACBF1284              | predicted ADP-heptose:LPS heptosyltransferase                            | 352        | homolog (65-70% ID/99% LC) present in 41 <i>E. coli</i> strains                    |
| EACBF1318              | predicted protein                                                        | 375        | homolog (77-79% ID/99% LC) present in 44 <i>E. coli</i> strains                    |
| EACBF1328              | predicted integrase                                                      | 409        | no homologues in <i>E. coli</i>                                                    |
| EACBF1370              | T3SS secreted effector NleG-like protein                                 | 140        | no homologues in <i>E. coli</i>                                                    |
| EACBF1371              | predicted protein                                                        | 125        | no homologues in <i>E. coli</i>                                                    |
| EACBF1389              | predicted protein                                                        | 125        | homolog (74-78% ID/98% LC) present in 8 <i>E. coli</i> strains                     |
| EACBF1465              | predicted protein                                                        | 371        | homolog (68% ID/100% LC) present in 19 <i>E. coli</i> strains                      |
| EACBF1496              | predicted oxidoreductase, membrane subunit                               | 285        | homolog (78-80% ID/100% LC) present in 40 <i>E. coli</i> strains                   |
| EACBF1622              | nicotinate-nucleotide--dimethylbenzimidazole phosphoribosyltransferase   | 354        | homolog (57-58% ID/99% LC) present in 44 <i>E. coli</i> strains                    |
| EACBF1623              | bifunctional cobinamide kinase/ cobinamide phosphate guanylyltransferase | 183        | homolog (56-57% ID/99% LC) present in 44 <i>E. coli</i> strains                    |
| EACBF1727              | T3SS secreted effector protein NleF                                      | 144        | homolog (55% ID/94% LC) present in 10 <i>E. coli</i> strains                       |
| EACBF1733              | predicted protein                                                        | 106        | no homologues in <i>E. coli</i>                                                    |
| EACBF1757              | predicted protein                                                        | 228        | no homologues in <i>E. coli</i>                                                    |
| EACBF1822              | flagellar hook-length control protein                                    | 371        | homolog (67-70% ID/100% LC) present in 44 <i>E. coli</i> strains                   |
| EACBF1922              | predicted colanic acid biosynthesis protein, fragment                    | 66         | homolog (60-62% ID/94-99% LC) present in 42 <i>E. coli</i> strains                 |
| EACBF2009              | cytolethal distending toxin A subunit                                    | 258        | no homologues in <i>E. coli</i>                                                    |
| EACBF2010              | cytolethal distending toxin B subunit                                    | 269        | homolog (56-57% ID/99% LC) present in 2 <i>E. coli</i> strains (IHE30 and APEC O1) |
| EACBF2102              | fumarate reductase, flaboprotein subunit                                 | 136        | no homologues in <i>E. coli</i>                                                    |
| EACBF2104              | predicted cytochrome c-type protein                                      | 194        | homolog (50% ID/86% LC) present in 44 <i>E. coli</i> strains                       |
| EACBF2108              | predicted autotransporter barrel domain-containing protein               | 862        | homolog (75-76% ID/86-100% LC) present in 30 <i>E. coli</i> strains                |
| EACBF2411              | predicted acetyltransferase                                              | 193        | no homologues in <i>E. coli</i>                                                    |
| EACBF2494              | putative transcriptional regulator, AraC family                          | 304        | no homologues in <i>E. coli</i>                                                    |
| EACBF2495              | Predicted acyl-CoA transferase                                           | 404        | no homologues in <i>E. coli</i>                                                    |
| EACBF2498              | predicted acyl-CoA dehydrogenase                                         | 386        | homolog (67-68% ID/98% LC) present in 44 <i>E. coli</i> strains                    |
| EACBF2499              | predicted electron transfer flavoprotein beta subunit                    | 254        | homolog (61-63% ID/100% LC) present in 44 <i>E. coli</i> strains                   |

|           |                                                 |     |                                                                     |
|-----------|-------------------------------------------------|-----|---------------------------------------------------------------------|
| EACBF2501 | predicted major facilitator superfamily protein | 463 | no homologues in <i>E. coli</i>                                     |
| EACBF2539 | putative alpha amylase                          | 738 | homolog (59-60% ID/91-94% LC) present in 20 <i>E. coli</i> strains  |
| EACBF2935 | predicted protein                               | 82  | no homologues in <i>E. coli</i>                                     |
| EACBF2945 | predicted protein                               | 352 | no homologues in <i>E. coli</i>                                     |
| EACBF2946 | predicted protein                               | 136 | no homologues in <i>E. coli</i>                                     |
| EACBF3043 | predicted protein                               | 62  | no homologues in <i>E. coli</i>                                     |
| EACBF3044 | predicted protein                               | 70  | no homologues in <i>E. coli</i>                                     |
| EACBF3058 | predicted protein                               | 155 | no homologues in <i>E. coli</i>                                     |
| EACBF3272 | predicted fimbrial assembly protein             | 179 | homolog (76-77% ID/100% LC) present in 44 <i>E. coli</i> strains    |
| EACBF3289 | predicted transposase, central part             | 78  | no homologues in <i>E. coli</i>                                     |
| EACBF3454 | alpha-amylase, N-ter part                       | 56  | homolog (64% ID/100% LC) present in 6 <i>E. coli</i> strains        |
| EACBF3543 | predicted protein                               | 97  | homolog (77-79% ID/100% LC) present in 44 <i>E. coli</i> strains    |
| EACBF3766 | predicted protein                               | 351 | homolog (69-80% ID/99% LC) present in 29 <i>E. coli</i> strains     |
| EACBF4094 | predicted protein                               | 385 | no homologues in <i>E. coli</i>                                     |
| EACBF4169 | predicted protein                               | 273 | homolog (61-63% ID/82-100% LC) present in 33 <i>E. coli</i> strains |
| EACBF4174 | predicted protein                               | 736 | no homologues in <i>E. coli</i>                                     |

<sup>a</sup> ID: identity; LC: length coverage

Table S5B. *E. albertii* species-specific genomic regions (>100 bp)

| Coordinates to the CB9786 genome sequence |         |             |
|-------------------------------------------|---------|-------------|
| start                                     | end     | length (bp) |
| 33174                                     | 33598   | 425         |
| 134204                                    | 134952  | 749         |
| 219227                                    | 219452  | 226         |
| 358511                                    | 358730  | 220         |
| 359983                                    | 360738  | 756         |
| 371946                                    | 372124  | 179         |
| 397524                                    | 397669  | 146         |
| 425047                                    | 426939  | 1893        |
| 548700                                    | 552284  | 3585        |
| 580508                                    | 581380  | 873         |
| 649204                                    | 649663  | 460         |
| 745367                                    | 746258  | 892         |
| 754247                                    | 754520  | 274         |
| 789786                                    | 791084  | 1299        |
| 807779                                    | 808489  | 711         |
| 853747                                    | 854503  | 757         |
| 1000002                                   | 1000107 | 106         |
| 1032319                                   | 1032485 | 167         |
| 1132866                                   | 1134337 | 1472        |
| 1171074                                   | 1171263 | 190         |
| 1219519                                   | 1219633 | 115         |



|         |         |      |
|---------|---------|------|
| 1250415 | 1251718 | 1304 |
| 1252519 | 1252684 | 166  |
| 1253575 | 1253847 | 273  |
| 1255894 | 1257381 | 1488 |
| 1258573 | 1258743 | 171  |
| 1263950 | 1264259 | 310  |
| 1265694 | 1266123 | 430  |
| 1266808 | 1266934 | 127  |
| 1270210 | 1270351 | 142  |
| 1285539 | 1286324 | 786  |
| 1289577 | 1289726 | 150  |
| 1302106 | 1305591 | 3486 |
| 1312208 | 1312368 | 161  |
| 1338241 | 1338448 | 208  |
| 1348645 | 1349567 | 923  |
| 1354965 | 1356009 | 1045 |
| 1357926 | 1358330 | 405  |
| 1368890 | 1369407 | 518  |
| 1403363 | 1404209 | 847  |
| 1405268 | 1405435 | 168  |
| 1406907 | 1407099 | 193  |
| 1408293 | 1408426 | 134  |
| 1410451 | 1410580 | 130  |
| 1438689 | 1438795 | 107  |
| 1438972 | 1439264 | 293  |
| 1448856 | 1449592 | 737  |
| 1480269 | 1480469 | 201  |
| 1491646 | 1491761 | 116  |
| 1506273 | 1506763 | 491  |
| 1510010 | 1510697 | 688  |
| 1527443 | 1527551 | 109  |
| 1594299 | 1594408 | 110  |
| 1627985 | 1628116 | 132  |
| 1634093 | 1634198 | 106  |
| 1734330 | 1735874 | 1545 |
| 1739959 | 1740893 | 935  |
| 1776689 | 1777643 | 955  |
| 1806910 | 1807170 | 261  |
| 1841811 | 1842274 | 464  |
| 1849169 | 1849377 | 209  |
| 1865514 | 1866519 | 1006 |
| 1885863 | 1886130 | 268  |

|         |         |      |
|---------|---------|------|
| 1896612 | 1896855 | 244  |
| 1943588 | 1943775 | 188  |
| 1950123 | 1950397 | 275  |
| 1952900 | 1953626 | 727  |
| 1955186 | 1955353 | 168  |
| 1965114 | 1965227 | 114  |
| 2021671 | 2022247 | 577  |
| 2185316 | 2185426 | 111  |
| 2208930 | 2212094 | 3165 |
| 2304568 | 2304703 | 136  |
| 2343381 | 2343486 | 106  |
| 2383510 | 2383646 | 137  |
| 2387500 | 2387848 | 349  |
| 2388157 | 2388261 | 105  |
| 2418546 | 2418919 | 374  |
| 2501123 | 2501397 | 275  |
| 2550928 | 2551153 | 226  |
| 2639910 | 2643977 | 4068 |
| 2689688 | 2689797 | 110  |
| 2689976 | 2692789 | 2814 |
| 2702191 | 2702463 | 273  |
| 2821561 | 2821675 | 115  |
| 2880486 | 2880585 | 100  |
| 2910128 | 2910894 | 767  |
| 2911801 | 2911900 | 100  |
| 2958494 | 2958652 | 159  |
| 2987936 | 2988984 | 1049 |
| 2999773 | 3000085 | 313  |
| 3114254 | 3114499 | 246  |
| 3115636 | 3115795 | 160  |
| 3125519 | 3126093 | 575  |
| 3136352 | 3137942 | 1591 |
| 3157479 | 3157856 | 378  |
| 3244537 | 3244961 | 425  |
| 3258662 | 3260172 | 1511 |
| 3293331 | 3293484 | 154  |
| 3469001 | 3469100 | 100  |
| 3600961 | 3601152 | 192  |
| 3609237 | 3609428 | 192  |
| 3615465 | 3615629 | 165  |
| 3668798 | 3668936 | 139  |
| 3670782 | 3670919 | 138  |

|              |         |       |
|--------------|---------|-------|
| 3690531      | 3691336 | 806   |
| 3698112      | 3698278 | 167   |
| 3738872      | 3739104 | 233   |
| 3761692      | 3761892 | 201   |
| 3762279      | 3762460 | 182   |
| 3764821      | 3766751 | 1931  |
| 3792490      | 3792646 | 157   |
| 4065949      | 4066596 | 648   |
| 4396916      | 4397294 | 379   |
| 4402572      | 4404078 | 1507  |
| 4490309      | 4491425 | 1117  |
| 4494827      | 4497617 | 2791  |
| 4516576      | 4516832 | 257   |
| total length |         | 71280 |

Table S6. *E. coli* K-12 genes that are absent in all of the three *E. albertii* strains completely sequenced in this study

| locus tag in the <i>E. coli</i> K-12 MG1655 genome | direction | gene        | product                                                                 | Prevalence in the 44 fully sequenced <i>E. coli</i> strains |
|----------------------------------------------------|-----------|-------------|-------------------------------------------------------------------------|-------------------------------------------------------------|
| b0070                                              | +         | <i>setA</i> | broad specificity sugar efflux system                                   | 40.9%                                                       |
| b0135                                              | -         | <i>yadC</i> | predicted fimbrial-like adhesin protein                                 | 6.8%                                                        |
| b0136                                              | -         | <i>yadK</i> | predicted fimbrial-like adhesin protein                                 | 6.8%                                                        |
| b0137                                              | -         | <i>yadL</i> | predicted fimbrial-like adhesin protein                                 | 40.9%                                                       |
| b0138                                              | -         | <i>yadM</i> | predicted fimbrial-like adhesin protein                                 | 38.6%                                                       |
| b0140                                              | -         | <i>ecpD</i> | predicted periplasmic pilin chaperone                                   | 45.5%                                                       |
| b0141                                              | -         | <i>yadN</i> | predicted fimbrial-like adhesin protein                                 | 43.2%                                                       |
| b0193                                              | -         | <i>yaeF</i> | predicted lipoprotein                                                   | 84.1%                                                       |
| b0210                                              | +         | <i>yafE</i> | predicted S-adenosyl-L-methionine-dependent methyltransferase           | 100.0%                                                      |
| b0225                                              | -         | <i>yafQ</i> | predicted toxin of the YafQ-DinJ toxin-antitoxin system                 | 50.0%                                                       |
| b0226                                              | -         | <i>dinJ</i> | predicted antitoxin of YafQ-DinJ toxin-antitoxin system                 | 59.1%                                                       |
| b0245                                              | -         | <i>ykfI</i> | CP4-6 prophage; toxin of the YkfI-YafW toxin-antitoxin system           | 4.5%                                                        |
| b0246                                              | -         | <i>yafW</i> | CP4-6 prophage; antitoxin of the YkfI-YafW toxin-antitoxin system       | 4.5%                                                        |
| b4504                                              | -         | <i>ykfH</i> | predicted protein                                                       | 2.3%                                                        |
| b0247                                              | -         | <i>ykfG</i> | CP4-6 prophage; predicted DNA repair protein                            | 4.5%                                                        |
| b0248                                              | -         | <i>yafX</i> | CP4-6 prophage; predicted protein                                       | 4.5%                                                        |
| b0249                                              | -         | <i>ykfF</i> | CP4-6 prophage; predicted protein                                       | 2.3%                                                        |
| b0250                                              | -         | <i>ykfB</i> | CP4-6 prophage; predicted protein                                       | 4.5%                                                        |
| b0253                                              | -         | <i>ykfA</i> | CP4-6 prophage; predicted GTP-binding protein                           | 4.5%                                                        |
| b0254                                              | -         | <i>perR</i> | CP4-6 prophage; predicted DNA-binding transcriptional regulator         | 2.3%                                                        |
| b0260                                              | +         | <i>mmuP</i> | CP4-6 prophage; predicted S-methylmethionine transporter                | 4.5%                                                        |
| b0261                                              | +         | <i>mmuM</i> | CP4-6 prophage; S-methylmethionine:homocysteine methyltransferase       | 4.5%                                                        |
| b0262                                              | -         | <i>afuC</i> | CP4-6 prophage; predicted ferric transporter subunit                    | 22.7%                                                       |
| b0267                                              | -         | <i>yagA</i> | CP4-6 prophage; predicted DNA-binding transcriptional regulator         | 2.3%                                                        |
| b0268                                              | +         | <i>yagE</i> | CP4-6 prophage; predicted lyase/synthase                                | 2.3%                                                        |
| b0269                                              | +         | <i>yagF</i> | CP4-6 prophage; predicted dehydratase                                   | 2.3%                                                        |
| b0270                                              | +         | <i>yagG</i> | CP4-6 prophage; predicted sugar transporter                             | 2.3%                                                        |
| b0271                                              | +         | <i>yagH</i> | CP4-6 prophage; predicted xylosidase/arabinoxidase                      | 2.3%                                                        |
| b0272                                              | -         | <i>yagI</i> | CP4-6 prophage; predicted DNA-binding transcriptional regulator         | 2.3%                                                        |
| b0277                                              | -         | <i>yagK</i> | CP4-6 prophage; conserved protein                                       | 2.3%                                                        |
| b0278                                              | -         | <i>yagL</i> | CP4-6 prophage; DNA-binding protein                                     | 2.3%                                                        |
| b0279                                              | -         | <i>yagM</i> | CP4-6 prophage; predicted protein                                       | 2.3%                                                        |
| b0280                                              | -         | <i>yagN</i> | CP4-6 prophage; predicted protein                                       | 2.3%                                                        |
| b0281                                              | -         | <i>intF</i> | CP4-6 prophage; predicted phage integrase                               | 2.3%                                                        |
| b0283                                              | -         | <i>yagQ</i> | conserved protein                                                       | 52.3%                                                       |
| b0284                                              | -         | <i>yagR</i> | predicted oxidoreductase with molybdenum-binding domain                 | 54.5%                                                       |
| b0285                                              | -         | <i>yagS</i> | predicted oxidoreductase with FAD-binding domain                        | 54.5%                                                       |
| b0286                                              | -         | <i>yagT</i> | predicted xanthine dehydrogenase, 2Fe-2S subunit                        | 52.3%                                                       |
| b0289                                              | -         | <i>yagV</i> | conserved protein                                                       | 90.9%                                                       |
| b0290                                              | -         | <i>yagW</i> | predicted receptor                                                      | 90.9%                                                       |
| b0291                                              | -         | <i>yagX</i> | predicted aromatic compound dioxygenase                                 | 93.2%                                                       |
| b0292                                              | -         | <i>matC</i> | predicted protein                                                       | 93.2%                                                       |
| b0293                                              | -         | <i>matB</i> | conserved protein                                                       | 90.9%                                                       |
| b0294                                              | -         | <i>matA</i> | predicted regulator                                                     | 95.5%                                                       |
| b0295                                              | +         | <i>ykgL</i> | predicted protein                                                       | 22.7%                                                       |
| b0310                                              | -         | <i>ykgH</i> | predicted inner membrane protein                                        | 81.8%                                                       |
| b0311                                              | -         | <i>betA</i> | choline dehydrogenase, a flavoprotein                                   | 97.7%                                                       |
| b0312                                              | -         | <i>betB</i> | betaine aldehyde dehydrogenase, NAD-dependent                           | 97.7%                                                       |
| b0313                                              | -         | <i>betI</i> | DNA-binding transcriptional repressor                                   | 97.7%                                                       |
| b0314                                              | +         | <i>betT</i> | choline transporter of high affinity                                    | 95.5%                                                       |
| b0325                                              | +         | <i>yahK</i> | predicted oxidoreductase, Zn-dependent and NAD(P)-binding               | 95.5%                                                       |
| b0326                                              | +         | <i>yahL</i> | predicted protein                                                       | 68.2%                                                       |
| b0327                                              | +         | <i>yahM</i> | predicted protein                                                       | 34.1%                                                       |
| b0336                                              | +         | <i>codB</i> | cytosine transporter                                                    | 100.0%                                                      |
| b0337                                              | +         | <i>codA</i> | cytosine deaminase                                                      | 100.0%                                                      |
| b0338                                              | -         | <i>cynR</i> | DNA-binding transcriptional dual regulator                              | 68.2%                                                       |
| b0339                                              | +         | <i>cynT</i> | carbonic anhydrase                                                      | 68.2%                                                       |
| b0340                                              | +         | <i>cynS</i> | cyanate aminohydrolase                                                  | 68.2%                                                       |
| b0341                                              | +         | <i>cynX</i> | predicted cyanate transporter                                           | 68.2%                                                       |
| b0342                                              | -         | <i>lacA</i> | thiogalactoside acetyltransferase                                       | 84.1%                                                       |
| b0343                                              | -         | <i>lacY</i> | lactose/galactose transporter                                           | 100.0%                                                      |
| b0345                                              | -         | <i>lacI</i> | DNA-binding transcriptional repressor                                   | 97.7%                                                       |
| b0346                                              | -         | <i>mhpR</i> | DNA-binding transcriptional activator, 3HPP-binding                     | 75.0%                                                       |
| b0347                                              | +         | <i>mhpA</i> | 3-(3-hydroxyphenyl)propionate hydroxylase                               | 75.0%                                                       |
| b0348                                              | +         | <i>mhpB</i> | 2,3-dihydroxyphenylpropionate 1,2-dioxygenase                           | 75.0%                                                       |
| b0349                                              | +         | <i>mhpC</i> | 2-hydroxy-6-ketono-2,4-dienedioic acid hydrolase                        | 75.0%                                                       |
| b0350                                              | +         | <i>mhpD</i> | 2-keto-4-pentenoate hydratase                                           | 75.0%                                                       |
| b0351                                              | +         | <i>mhpF</i> | acetaldehyde-CoA dehydrogenase II, NAD-binding                          | 75.0%                                                       |
| b0352                                              | +         | <i>mhpE</i> | 4-hydroxy-2-oxovalerate/4-hydroxy-2-oxopentanoic acid aldolase, class I | 75.0%                                                       |
| b0353                                              | +         | <i>mhpT</i> | predicted 3-hydroxyphenylpropionic transporter                          | 75.0%                                                       |
| b0358                                              | -         | <i>yaiO</i> | predicted protein                                                       | 79.5%                                                       |

|       |   |             |                                                                                            |        |
|-------|---|-------------|--------------------------------------------------------------------------------------------|--------|
| b0363 | - | <i>yaiP</i> | predicted glucosyltransferase                                                              | 79.5%  |
| b0364 | - | <i>yaiS</i> | conserved protein                                                                          | 72.7%  |
| b0389 | + | <i>yaiA</i> | predicted protein                                                                          | 95.5%  |
| b0396 | - | <i>araJ</i> | predicted transporter                                                                      | 97.7%  |
| b0498 | + | <i>ybbC</i> | predicted protein                                                                          | 27.3%  |
| b0504 | - | <i>allS</i> | DNA-binding transcriptional activator of the allD operon                                   | 97.7%  |
| b0505 | + | <i>allA</i> | ureidoglycolate hydrolase                                                                  | 97.7%  |
| b0506 | + | <i>allR</i> | DNA-binding transcriptional repressor                                                      | 81.8%  |
| b0507 | + | <i>gcl</i>  | glyoxylate carboligase                                                                     | 97.7%  |
| b0508 | + | <i>hyi</i>  | hydroxypyruvate isomerase                                                                  | 95.5%  |
| b0509 | + | <i>glxR</i> | tartronate semialdehyde reductase, NADH-dependent                                          | 97.7%  |
| b0511 | + | <i>ybbW</i> | predicted allantoin transporter                                                            | 95.5%  |
| b0512 | + | <i>allB</i> | allantoinase                                                                               | 88.6%  |
| b0513 | + | <i>ybbY</i> | predicted uracil/xanthine transporter                                                      | 95.5%  |
| b0514 | + | <i>glxK</i> | glycerate kinase II                                                                        | 100.0% |
| b0515 | - | <i>ylbA</i> | conserved protein                                                                          | 100.0% |
| b0516 | - | <i>allC</i> | allantoate amidohydrolase                                                                  | 97.7%  |
| b0517 | - | <i>allD</i> | ureidoglycolate dehydrogenase                                                              | 100.0% |
| b0518 | + | <i>fdrA</i> | predicted acyl-CoA synthetase with NAD(P)-binding Rossmann-fold domain                     | 97.7%  |
| b0520 | + | <i>ybfF</i> | conserved protein                                                                          | 100.0% |
| b0521 | + | <i>ybcF</i> | predicted carbamate kinase                                                                 | 100.0% |
| b0544 | + | <i>ybcK</i> | DLP12 prophage; predicted recombinase                                                      | 27.3%  |
| b4588 | + | <i>ylcH</i> | hypothetical protein, DLP12 prophage                                                       | 4.5%   |
| b0547 | + | <i>ybcN</i> | DLP12 prophage; predicted protein                                                          | 54.5%  |
| b0548 | + | <i>ninE</i> | DLP12 prophage; conserved protein                                                          | 40.9%  |
| b0549 | + | <i>ybcO</i> | DLP12 prophage; predicted protein                                                          | 50.0%  |
| b0550 | + | <i>rusA</i> | DLP12 prophage; endonuclease RUS                                                           | 70.5%  |
| b4509 | + | <i>ylcG</i> | DLP12 prophage; predicted protein                                                          | 31.8%  |
| b0551 | + | <i>ybcQ</i> | DLP12 prophage; predicted antitermination protein                                          | 59.1%  |
| b0558 | - | <i>ybcV</i> | DLP12 prophage; predicted protein                                                          | 22.7%  |
| b0559 | + | <i>ybcW</i> | DLP12 prophage; predicted protein                                                          | 29.5%  |
| b0564 | + | <i>appY</i> | DLP12 prophage; DNA-binding transcriptional activator                                      | 4.5%   |
| b0581 | - | <i>ybdK</i> | gamma-glutamyl:cysteine ligase                                                             | 100.0% |
| b0608 | + | <i>ybdR</i> | predicted oxidoreductase, Zn-dependent and NAD(P)-binding                                  | 54.5%  |
| b0689 | + | <i>ybfP</i> | predicted protein                                                                          | 25.0%  |
| b0730 | - | <i>mngR</i> | DNA-binding transcriptional dual regulator, fatty-acyl-binding                             | 47.7%  |
| b0731 | + | <i>mngA</i> | fused 2-O-a-mannosyl-D-glycerate specific PTS enzymes: IIA component/IIB component/IIC com | 43.2%  |
| b0732 | + | <i>mngB</i> | alpha-mannosidase                                                                          | 43.2%  |
| b0753 | - | <i>ybgS</i> | conserved protein                                                                          | 100.0% |
| b0788 | - | <i>ybhN</i> | conserved inner membrane protein                                                           | 100.0% |
| b0789 | - | <i>ybhO</i> | cardiolipin synthase 2                                                                     | 100.0% |
| b0790 | - | <i>ybhP</i> | predicted DNase                                                                            | 100.0% |
| b0804 | - | <i>ybiX</i> | conserved protein                                                                          | 100.0% |
| b0805 | - | <i>fiu</i>  | predicted iron outer membrane transporter                                                  | 97.7%  |
| b0808 | - | <i>ybiO</i> | predicted mechanosensitive channel                                                         | 100.0% |
| b0816 | + | <i>yliL</i> | predicted protein                                                                          | 4.5%   |
| b0821 | - | <i>ybiU</i> | predicted protein                                                                          | 59.1%  |
| b0837 | + | <i>yliI</i> | predicted dehydrogenase                                                                    | 97.7%  |
| b0900 | - | <i>ycaN</i> | predicted DNA-binding transcriptional regulator                                            | 43.2%  |
| b0901 | + | <i>ycaK</i> | conserved protein                                                                          | 43.2%  |
| b0906 | + | <i>ycaP</i> | conserved inner membrane protein                                                           | 100.0% |
| b0909 | + | <i>ycaL</i> | predicted peptidase with chaperone function                                                | 100.0% |
| b0933 | - | <i>ssuB</i> | alkanesulfonate transporter subunit                                                        | 100.0% |
| b0934 | - | <i>ssuC</i> | alkanesulfonate transporter subunit                                                        | 100.0% |
| b0935 | - | <i>ssuD</i> | alkanesulfonate monooxygenase, FMNH(2)-dependent                                           | 100.0% |
| b0936 | - | <i>ssuA</i> | alkanesulfonate transporter subunit                                                        | 97.7%  |
| b0937 | - | <i>ssuE</i> | NAD(P)H-dependent FMN reductase                                                            | 100.0% |
| b0938 | + | <i>ycbQ</i> | predicted fimbrial-like adhesin protein                                                    | 34.1%  |
| b0939 | + | <i>ycbR</i> | predicted periplasmic pilin chaperone                                                      | 63.6%  |
| b0940 | + | <i>ycbS</i> | predicted outer membrane usher protein                                                     | 47.7%  |
| b0941 | + | <i>ycbT</i> | predicted fimbrial-like adhesin protein                                                    | 54.5%  |
| b0942 | + | <i>ycbU</i> | predicted fimbrial-like adhesin protein                                                    | 61.4%  |
| b0943 | + | <i>ycbV</i> | predicted fimbrial-like adhesin protein                                                    | 63.6%  |
| b0944 | + | <i>ycbF</i> | predicted periplasmic pilini chaperone                                                     | 52.3%  |
| b4592 | + | <i>yccB</i> | hypothetical protein                                                                       | 31.8%  |
| b0987 | - | <i>gfcA</i> | predicted protein                                                                          | 52.3%  |
| b0991 | + | <i>ymcE</i> | cold shock gene                                                                            | 61.4%  |
| b1001 | + | <i>yccE</i> | predicted protein                                                                          | 11.4%  |
| b1006 | - | <i>rutG</i> | predicted transporter                                                                      | 88.6%  |
| b1007 | - | <i>rutF</i> | predicted oxidoreductase, flavin:NADH component                                            | 100.0% |
| b1008 | - | <i>rutE</i> | predicted oxidoreductase                                                                   | 100.0% |
| b1009 | - | <i>rutD</i> | predicted hydrolase                                                                        | 100.0% |
| b1010 | - | <i>rutC</i> | conserved protein                                                                          | 95.5%  |
| b1011 | - | <i>rutB</i> | predicted enzyme                                                                           | 97.7%  |

|       |   |             |                                                                                       |        |
|-------|---|-------------|---------------------------------------------------------------------------------------|--------|
| b1012 | - | <i>rutA</i> | predicted monooxygenase                                                               | 100.0% |
| b1021 | - | <i>pgaD</i> | predicted inner membrane protein                                                      | 79.5%  |
| b1022 | - | <i>pgaC</i> | predicted glycosyl transferase                                                        | 79.5%  |
| b1023 | - | <i>pgaB</i> | predicted enzyme associated with biofilm formation                                    | 77.3%  |
| b1024 | - | <i>pgaA</i> | predicted outer membrane protein                                                      | 72.7%  |
| b1029 | + | <i>ycdU</i> | predicted inner membrane protein                                                      | 47.7%  |
| b1056 | - | <i>yceI</i> | predicted protein                                                                     | 100.0% |
| b1057 | - | <i>yceJ</i> | predicted cytochrome b561                                                             | 100.0% |
| b1064 | - | <i>grxB</i> | glutaredoxin 2 (Grx2)                                                                 | 100.0% |
| b1102 | - | <i>fhuE</i> | ferric-rhodotorulic acid outer membrane transporter                                   | 97.7%  |
| b1115 | - | <i>ycfT</i> | predicted inner membrane protein                                                      | 100.0% |
| b1137 | - | <i>ymfD</i> | e14 prophage; predicted SAM-dependent methyltransferase                               | 2.3%   |
| b1138 | - | <i>ymfE</i> | e14 prophage; predicted inner membrane protein                                        | 2.3%   |
| b1139 | + | <i>lit</i>  | e14 prophage; cell death peptidase, inhibitor of T4 late gene expression              | 2.3%   |
| b1141 | - | <i>xisE</i> | e14 prophage; predicted excisionase                                                   | 2.3%   |
| b1143 | + | <i>ymfI</i> | e14 prophage; predicted protein                                                       | 2.3%   |
| b1144 | - | <i>ymfJ</i> | e14 prophage; predicted protein                                                       | 2.3%   |
| b1159 | + | <i>mcrA</i> | e14 prophage; 5-methylcytosine-specific restriction endonuclease B                    | 2.3%   |
| b1160 | - | <i>elbA</i> | predicted protein                                                                     | 43.2%  |
| b1162 | - | <i>ycgE</i> | predicted DNA-binding transcriptional regulator                                       | 86.4%  |
| b1163 | - | <i>ycgF</i> | predicted FAD-binding phosphodiesterase                                               | 77.3%  |
| b1164 | + | <i>ycgZ</i> | predicted protein                                                                     | 68.2%  |
| b1165 | + | <i>ymgA</i> | predicted protein                                                                     | 63.6%  |
| b1166 | + | <i>ymgB</i> | predicted protein                                                                     | 79.5%  |
| b1167 | + | <i>ymgC</i> | predicted protein                                                                     | 72.7%  |
| b1168 | + | <i>ycgG</i> | conserved inner membrane protein                                                      | 52.3%  |
| b4593 | - | <i>ymgI</i> | hypothetical protein                                                                  | 25.0%  |
| b4594 | + | <i>ymgJ</i> | hypothetical protein                                                                  | 11.4%  |
| b1177 | + | <i>ycgJ</i> | predicted protein                                                                     | 100.0% |
| b1182 | - | <i>hlyE</i> | hemolysin E                                                                           | 38.6%  |
| b1183 | + | <i>umuD</i> | DNA polymerase V, subunit D                                                           | 100.0% |
| b1184 | + | <i>umuC</i> | DNA polymerase V, subunit C                                                           | 97.7%  |
| b1202 | - | <i>ycgV</i> | predicted adhesin                                                                     | 45.5%  |
| b4423 | - | <i>ldrC</i> | toxic polypeptide, small                                                              | 81.8%  |
| b1217 | + | <i>chaB</i> | predicted cation regulator                                                            | 97.7%  |
| b1220 | + | <i>ychO</i> | predicted invasin                                                                     | 100.0% |
| b1229 | - | <i>tpr</i>  | predicted protamine-like protein                                                      | 6.8%   |
| b4595 | + | <i>yciY</i> | hypothetical protein                                                                  | 56.8%  |
| b1257 | - | <i>yciE</i> | conserved protein                                                                     | 88.6%  |
| b1258 | - | <i>yciF</i> | conserved protein                                                                     | 90.9%  |
| b1268 | + | <i>yciQ</i> | predicted inner membrane protein                                                      | 54.5%  |
| b4522 | + | <i>ymiA</i> | hypothetical protein                                                                  | 86.4%  |
| b4523 | + | <i>yciX</i> | hypothetical protein                                                                  | 84.1%  |
| b1309 | + | <i>ycjM</i> | predicted glucosyltransferase                                                         | 77.3%  |
| b1310 | + | <i>ycjN</i> | predicted sugar transporter subunit: periplasmic-binding component of ABC superfamily | 84.1%  |
| b1311 | + | <i>ycjO</i> | predicted sugar transporter subunit: membrane component of ABC superfamily            | 93.2%  |
| b1312 | + | <i>ycjP</i> | predicted sugar transporter subunit: membrane component of ABC superfamily            | 95.5%  |
| b1313 | + | <i>ycjQ</i> | predicted oxidoreductase, Zn-dependent and NAD(P)-binding                             | 93.2%  |
| b1314 | + | <i>ycjR</i> | predicted enzyme                                                                      | 95.5%  |
| b1315 | + | <i>ycjS</i> | predicted oxidoreductase, NADH-binding                                                | 93.2%  |
| b1316 | + | <i>ycjT</i> | predicted hydrolase                                                                   | 90.9%  |
| b1317 | + | <i>ycjU</i> | predicted beta-phosphoglucomutase                                                     | 93.2%  |
| b1319 | + | <i>ompG</i> | outer membrane porin                                                                  | 93.2%  |
| b1320 | - | <i>ycjW</i> | predicted DNA-binding transcriptional regulator                                       | 95.5%  |
| b1336 | - | <i>abgT</i> | predicted cryptic aminobenzoyl-glutamate transporter                                  | 59.1%  |
| b1337 | - | <i>abgB</i> | predicted peptidase, aminobenzoyl-glutamate utilization protein                       | 65.9%  |
| b1338 | - | <i>abgA</i> | predicted peptidase, aminobenzoyl-glutamate utilization protein                       | 68.2%  |
| b1339 | + | <i>abgR</i> | predicted DNA-binding transcriptional regulator                                       | 68.2%  |
| b1345 | - | <i>intR</i> | Rac prophage; integrase                                                               | 25.0%  |
| b1346 | - | <i>ydaQ</i> | Rac prophage; conserved protein                                                       | 22.7%  |
| b1347 | - | <i>ydaC</i> | Rac prophage; predicted protein                                                       | 25.0%  |
| b1348 | - | <i>lar</i>  | Rac prophage; restriction alleviation protein                                         | 15.9%  |
| b1349 | - | <i>recT</i> | Rac prophage; recombination and repair protein                                        | 20.5%  |
| b1350 | - | <i>recE</i> | Rac prophage; exonuclease VIII, 5' -> 3' specific dsDNA exonuclease                   | 15.9%  |
| b1351 | - | <i>racC</i> | Rac prophage; predicted protein                                                       | 20.5%  |
| b4526 | - | <i>ydaE</i> | Rac prophage; conserved protein                                                       | 6.8%   |
| b1353 | + | <i>sieB</i> | Rac prophage; phage superinfection exclusion protein                                  | 13.6%  |
| b1355 | - | <i>ydaG</i> | Rac prophage; predicted protein                                                       | 13.6%  |
| b1356 | - | <i>racR</i> | Rac prophage; predicted DNA-binding transcriptional regulator                         | 18.2%  |
| b1357 | + | <i>ydaS</i> | Rac prophage; predicted DNA-binding transcriptional regulator                         | 4.5%   |
| b1358 | + | <i>ydaT</i> | Rac prophage; predicted protein                                                       | 20.5%  |
| b1365 | + | <i>ynaK</i> | Rac prophage; conserved protein                                                       | 2.3%   |
| b1384 | - | <i>fear</i> | DNA-binding transcriptional dual regulator                                            | 40.9%  |
| b1385 | + | <i>feab</i> | phenylacetaldehyde dehydrogenase                                                      | 38.6%  |

|       |   |             |                                                                                                       |        |
|-------|---|-------------|-------------------------------------------------------------------------------------------------------|--------|
| b1386 | - | <i>tynA</i> | tyramine oxidase, copper-requiring                                                                    | 40.9%  |
| b1387 | - | <i>maoC</i> | fused aldehyde dehydrogenase/enoyl-CoA hydratase                                                      | 40.9%  |
| b1388 | + | <i>paaA</i> | predicted multicomponent oxygenase/reductase subunit for phenylacetic acid degradation                | 40.9%  |
| b1389 | + | <i>paaB</i> | predicted multicomponent oxygenase/reductase subunit for phenylacetic acid degradation                | 40.9%  |
| b1390 | + | <i>paaC</i> | predicted multicomponent oxygenase/reductase subunit for phenylacetic acid degradation                | 40.9%  |
| b1391 | + | <i>paaD</i> | predicted multicomponent oxygenase/reductase subunit for phenylacetic acid degradation                | 40.9%  |
| b1392 | + | <i>paaE</i> | predicted multicomponent oxygenase/reductase subunit for phenylacetic acid degradation                | 40.9%  |
| b1393 | + | <i>paaF</i> | enoyl-CoA hydratase-isomerase                                                                         | 40.9%  |
| b1394 | + | <i>paaG</i> | acyl-CoA hydratase                                                                                    | 40.9%  |
| b1395 | + | <i>paaH</i> | 3-hydroxybutyryl-CoA dehydrogenase                                                                    | 40.9%  |
| b1396 | + | <i>paal</i> | predicted thioesterase                                                                                | 40.9%  |
| b1397 | + | <i>paaJ</i> | predicted beta-ketoadipyl CoA thiolase                                                                | 40.9%  |
| b1398 | + | <i>paaK</i> | phenylacetyl-CoA ligase                                                                               | 40.9%  |
| b1399 | + | <i>paaX</i> | DNA-binding transcriptional repressor of phenylacetic acid degradation, aryl-CoA responsive           | 40.9%  |
| b1400 | + | <i>paaY</i> | predicted hexapeptide repeat acetyltransferase                                                        | 43.2%  |
| b1408 | + | <i>ynbA</i> | predicted inner membrane protein                                                                      | 11.4%  |
| b1409 | + | <i>ynbB</i> | predicted CDP-diglyceride synthase                                                                    | 84.1%  |
| b1410 | + | <i>ynbC</i> | predicted hydrolase                                                                                   | 88.6%  |
| b1411 | + | <i>ynbD</i> | predicted phosphatase, inner membrane protein                                                         | 88.6%  |
| b1415 | + | <i>aldA</i> | aldehyde dehydrogenase A, NAD-linked                                                                  | 95.5%  |
| b4428 | - | <i>hokB</i> | toxic polypeptide, small                                                                              | 29.5%  |
| b1420 | - | <i>mokB</i> | regulatory peptide                                                                                    | 38.6%  |
| b1421 | + | <i>trg</i>  | methyl-accepting chemotaxis protein III, ribose and galactose sensor receptor                         | 63.6%  |
| b1432 | + | <i>ydcM</i> | predicted transposase                                                                                 | 75.0%  |
| b1433 | - | <i>ydcO</i> | predicted benzoate transporter                                                                        | 90.9%  |
| b1434 | + | <i>ydcN</i> | predicted DNA-binding transcriptional regulator                                                       | 97.7%  |
| b4532 | + | <i>yncN</i> | predicted protein                                                                                     | 18.2%  |
| b1438 | + | <i>ydcQ</i> | predicted DNA-binding transcriptional regulator                                                       | 63.6%  |
| b1450 | + | <i>yncC</i> | predicted DNA-binding transcriptional regulator                                                       | 65.9%  |
| b1454 | + | <i>yncG</i> | predicted enzyme                                                                                      | 72.7%  |
| b1455 | + | <i>yncH</i> | predicted protein                                                                                     | 40.9%  |
| b1457 | + | <i>ydcD</i> | predicted protein                                                                                     | 27.3%  |
| b1470 | - | <i>yddJ</i> | predicted protein                                                                                     | 6.8%   |
| b1480 | - | <i>sra</i>  | 30S ribosomal subunit protein S22                                                                     | 81.8%  |
| b1481 | - | <i>bdm</i>  | biofilm-dependent modulation protein                                                                  | 100.0% |
| b1483 | - | <i>ddpF</i> | D-ala-D-ala transporter subunit                                                                       | 65.9%  |
| b1484 | - | <i>ddpD</i> | D-ala-D-ala transporter subunit                                                                       | 38.6%  |
| b1485 | - | <i>ddpC</i> | D-ala-D-ala transporter subunit                                                                       | 68.2%  |
| b1486 | - | <i>ddpB</i> | D-ala-D-ala transporter subunit                                                                       | 68.2%  |
| b1487 | - | <i>ddpA</i> | D-ala-D-ala transporter subunit                                                                       | 63.6%  |
| b1488 | - | <i>ddpX</i> | D-ala-D-ala dipeptidase, Zn-dependent                                                                 | 65.9%  |
| b1494 | - | <i>pqqL</i> | predicted peptidase                                                                                   | 88.6%  |
| b1495 | - | <i>yddB</i> | predicted porin protein                                                                               | 88.6%  |
| b1496 | - | <i>yddA</i> | fused predicted multidrug transporter subunits of ABC superfamily: membrane component/ATP-bi          | 88.6%  |
| b1499 | - | <i>ydeO</i> | predicted DNA-binding transcriptional activator                                                       | 95.5%  |
| b1501 | - | <i>ydeP</i> | predicted oxidoreductase                                                                              | 100.0% |
| b1502 | - | <i>ydeQ</i> | predicted fimbrial-like adhesin protein                                                               | 93.2%  |
| b1503 | - | <i>ydeR</i> | predicted fimbrial-like adhesin protein                                                               | 84.1%  |
| b1504 | - | <i>ydeS</i> | predicted fimbrial-like adhesin protein                                                               | 86.4%  |
| b1507 | - | <i>hipA</i> | regulator with hipB                                                                                   | 81.8%  |
| b1508 | - | <i>hipB</i> | DNA-binding transcriptional regulator                                                                 | 81.8%  |
| b1511 | - | <i>lsrK</i> | autoinducer-2 (AI-2) kinase                                                                           | 61.4%  |
| b1512 | - | <i>lsrR</i> | lsr operon transcriptional repressor                                                                  | 65.9%  |
| b1513 | + | <i>lsrA</i> | fused AI2 transporter subunits of ABC superfamily: ATP-binding components                             | 63.6%  |
| b1514 | + | <i>lsrC</i> | AI2 transporter                                                                                       | 63.6%  |
| b1515 | + | <i>lsrD</i> | AI2 transporter                                                                                       | 63.6%  |
| b1516 | + | <i>lsrB</i> | AI2 transporter                                                                                       | 65.9%  |
| b1517 | + | <i>lsrF</i> | putative autoinducer-2 (AI-2) aldolase                                                                | 65.9%  |
| b1518 | + | <i>lsrG</i> | autoinducer-2 (AI-2) modifying protein LsrG                                                           | 61.4%  |
| b4599 | + | <i>yneM</i> | hypothetical protein                                                                                  | 27.3%  |
| b1536 | - | <i>ydeI</i> | conserved protein                                                                                     | 65.9%  |
| b1537 | + | <i>ydeJ</i> | conserved protein                                                                                     | 56.8%  |
| b1547 | - | <i>ydfN</i> | Qin prophage; predicted side tail fibre assembly protein                                              | 2.3%   |
| b1551 | - | <i>ydfV</i> | Qin prophage; predicted protein                                                                       | 13.6%  |
| b1553 | - | <i>ydfP</i> | Qin prophage; conserved protein                                                                       | 31.8%  |
| b1563 | - | <i>relE</i> | Qin prophage; toxin of the RelE-RelB toxin-antitoxin system                                           | 15.9%  |
| b1564 | - | <i>relB</i> | Qin prophage; bifunctional antitoxin of the RelE-RelB toxin-antitoxin system/ transcriptional repress | 20.5%  |
| b1565 | + | <i>ydfV</i> | Qin prophage; predicted protein                                                                       | 6.8%   |
| b1566 | + | <i>flxA</i> | Qin prophage; predicted protein                                                                       | 18.2%  |
| b1572 | + | <i>ydfB</i> | Qin prophage; predicted protein                                                                       | 52.3%  |
| b1615 | - | <i>uidC</i> | predicted outer membrane porin protein                                                                | 90.9%  |
| b1617 | - | <i>uidA</i> | beta-D-glucuronidase                                                                                  | 93.2%  |
| b1618 | - | <i>uidR</i> | DNA-binding transcriptional repressor                                                                 | 100.0% |
| b1646 | - | <i>sodC</i> | superoxide dismutase, Cu, Zn                                                                          | 100.0% |

|       |   |             |                                                                                                    |        |
|-------|---|-------------|----------------------------------------------------------------------------------------------------|--------|
| b1657 | - | <i>ydhP</i> | predicted transporter                                                                              | 100.0% |
| b4602 | - | <i>ynhF</i> | hypothetical protein                                                                               | 54.5%  |
| b1668 | + | <i>ydhS</i> | conserved protein with FAD/NAD(P)-binding domain                                                   | 93.2%  |
| b1705 | + | <i>ydiE</i> | conserved protein                                                                                  | 95.5%  |
| b1715 | - | <i>pheM</i> | phenylalanyl-tRNA synthetase operon leader peptide                                                 | 45.5%  |
| b1730 | - | <i>ydjO</i> | predicted protein                                                                                  | 31.8%  |
| b1732 | + | <i>katE</i> | hydroperoxidase HPII(III) (catalase)                                                               | 100.0% |
| b1741 | + | <i>cho</i>  | endonuclease of nucleotide excision repair                                                         | 100.0% |
| b1762 | - | <i>ynjI</i> | predicted inner membrane protein                                                                   | 50.0%  |
| b1781 | - | <i>yeaE</i> | predicted oxidoreductase                                                                           | 100.0% |
| b1790 | - | <i>yeaM</i> | predicted DNA-binding transcriptional regulator                                                    | 97.7%  |
| b1791 | + | <i>yeaN</i> | predicted transporter                                                                              | 100.0% |
| b1846 | - | <i>yebE</i> | conserved protein                                                                                  | 97.7%  |
| b1877 | + | <i>yecT</i> | predicted protein                                                                                  | 54.5%  |
| b1881 | - | <i>cheZ</i> | chemotaxis regulator, protein phosphatase for CheY                                                 | 100.0% |
| b1882 | - | <i>cheY</i> | chemotaxis regulator transmitting signal to flagellar motor component                              | 100.0% |
| b1883 | - | <i>cheB</i> | fused chemotaxis regulator: protein-glutamate methyltransferase in two-component regulatory system | 100.0% |
| b1884 | - | <i>cheR</i> | chemotaxis regulator, protein-glutamate methyltransferase                                          | 100.0% |
| b1885 | - | <i>tap</i>  | methyl-accepting protein IV                                                                        | 61.4%  |
| b1886 | - | <i>tar</i>  | methyl-accepting chemotaxis protein II                                                             | 100.0% |
| b1887 | - | <i>cheW</i> | purine-binding chemotaxis protein                                                                  | 100.0% |
| b1923 | - | <i>fliC</i> | flagellar filament structural protein (flagellin)                                                  | 2.3%   |
| b1931 | + | <i>yedK</i> | predicted protein                                                                                  | 77.3%  |
| b1932 | + | <i>yedL</i> | predicted acyltransferase                                                                          | 25.0%  |
| b1943 | + | <i>fliK</i> | flagellar hook-length control protein                                                              | 100.0% |
| b1951 | + | <i>rcsA</i> | DNA-binding transcriptional activator, co-regulator with RcsB                                      | 100.0% |
| b1974 | + | <i>yodB</i> | predicted cytochrome                                                                               | 47.7%  |
| b1978 | + | <i>yeeJ</i> | adhesin                                                                                            | 11.4%  |
| b1983 | + | <i>yeeN</i> | conserved protein                                                                                  | 100.0% |
| b1991 | - | <i>cobT</i> | nicotinate-nucleotide dimethylbenzimidazole-P phosphoribosyl transferase                           | 100.0% |
| b1993 | - | <i>cobU</i> | bifunctional cobinamide kinase/ cobinamide phosphate guanylyltransferase                           | 97.7%  |
| b2000 | + | <i>flu</i>  | CP4-44 prophage; antigen 43 (Ag43) phase-variable biofilm formation autotransporter                | 9.1%   |
| b2001 | + | <i>yeeR</i> | CP4-44 prophage; predicted membrane protein                                                        | 2.3%   |
| b2002 | + | <i>yeeS</i> | CP4-44 prophage; predicted DNA repair protein                                                      | 81.8%  |
| b2003 | + | <i>yeeT</i> | CP4-44 prophage; predicted protein                                                                 | 77.3%  |
| b2005 | + | <i>yeeV</i> | CP4-44 prophage; toxin of the YeeV-YeeU toxin-antitoxin system                                     | 31.8%  |
| b2012 | - | <i>yeeD</i> | conserved protein                                                                                  | 65.9%  |
| b2013 | - | <i>yeeE</i> | predicted inner membrane protein                                                                   | 70.5%  |
| b4539 | - | <i>yoeB</i> | toxin of the YoeB-YefM toxin-antitoxin system                                                      | 72.7%  |
| b2017 | - | <i>yefM</i> | antitoxin of the YoeB-YefM toxin-antitoxin system                                                  | 75.0%  |
| b2032 | - | <i>wbbK</i> | lipopolysaccharide biosynthesis protein                                                            | 4.5%   |
| b2033 | - | <i>wbbJ</i> | predicted acyl transferase                                                                         | 4.5%   |
| b2034 | - | <i>wbbI</i> | conserved protein                                                                                  | 4.5%   |
| b2035 | - | <i>rfc</i>  | O-antigen polymerase                                                                               | 4.5%   |
| b2036 | - | <i>glf</i>  | UDP-galactopyranose mutase, FAD/NAD(P)-binding                                                     | 4.5%   |
| b2037 | - | <i>rfbX</i> | predicted polisoprenol-linked O-antigen transporter                                                | 4.5%   |
| b2043 | - | <i>wcaM</i> | predicted colanic acid biosynthesis protein                                                        | 95.5%  |
| b2045 | - | <i>wcaK</i> | predicted pyruvyl transferase                                                                      | 95.5%  |
| b2046 | - | <i>wzcC</i> | colanic acid exporter                                                                              | 93.2%  |
| b2047 | - | <i>wcaJ</i> | predicted UDP-glucose lipid carrier transferase                                                    | 95.5%  |
| b2048 | - | <i>cpsG</i> | phosphomannomutase                                                                                 | 95.5%  |
| b2049 | - | <i>cpsB</i> | mannose-1-phosphate guanylyltransferase                                                            | 95.5%  |
| b2050 | - | <i>wcaI</i> | predicted glycosyl transferase                                                                     | 93.2%  |
| b2052 | - | <i>fcl</i>  | bifunctional GDP-fucose synthetase: GDP-4-dehydro-6-deoxy-D-mannose epimerase/ GDP-4-deh           | 95.5%  |
| b2053 | - | <i>gmd</i>  | GDP-D-mannose dehydratase, NAD(P)-binding                                                          | 95.5%  |
| b2055 | - | <i>wcaE</i> | predicted glycosyl transferase                                                                     | 95.5%  |
| b2056 | - | <i>wcaD</i> | predicted colanic acid polymerase                                                                  | 97.7%  |
| b2057 | - | <i>wcaC</i> | predicted glycosyl transferase                                                                     | 95.5%  |
| b2058 | - | <i>wcaB</i> | predicted acyl transferase                                                                         | 95.5%  |
| b2059 | - | <i>wcaA</i> | predicted glycosyl transferase                                                                     | 95.5%  |
| b2060 | - | <i>wzc</i>  | protein-tyrosine kinase                                                                            | 95.5%  |
| b2070 | - | <i>yegI</i> | conserved protein                                                                                  | 97.7%  |
| b2071 | + | <i>yegJ</i> | predicted protein                                                                                  | 22.7%  |
| b2072 | - | <i>yegK</i> | predicted protein                                                                                  | 100.0% |
| b2073 | - | <i>yegL</i> | conserved protein                                                                                  | 100.0% |
| b2085 | - | <i>yegR</i> | predicted protein                                                                                  | 97.7%  |
| b2091 | - | <i>gatD</i> | galactitol-1-phosphate dehydrogenase, Zn-dependent and NAD(P)-binding                              | 90.9%  |
| b2092 | - | <i>gatC</i> | galactitol-specific enzyme IIC component of PTS                                                    | 90.9%  |
| b2093 | - | <i>gatB</i> | galactitol-specific enzyme IIB component of PTS                                                    | 90.9%  |
| b2094 | - | <i>gatA</i> | galactitol-specific enzyme IIA component of PTS                                                    | 93.2%  |
| b2095 | - | <i>gatZ</i> | D-tagatose 1,6-bisphosphate aldolase 2, subunit                                                    | 84.1%  |
| b2096 | - | <i>gatY</i> | D-tagatose 1,6-bisphosphate aldolase 2, catalytic subunit                                          | 90.9%  |
| b4542 | + | <i>yohO</i> | predicted protein                                                                                  | 45.5%  |
| b2137 | - | <i>yohF</i> | predicted oxidoreductase with NAD(P)-binding Rossmann-fold domain                                  | 97.7%  |



|       |   |             |                                                                                |        |
|-------|---|-------------|--------------------------------------------------------------------------------|--------|
| b2154 | + | <i>yeiG</i> | predicted esterase                                                             | 100.0% |
| b2162 | - | <i>rihB</i> | ribonucleoside hydrolase 2                                                     | 100.0% |
| b2163 | + | <i>yeiL</i> | DNA-binding transcriptional activator of stationary phase nitrogen survival    | 100.0% |
| b4604 | + | <i>yajO</i> | hypothetical protein                                                           | 59.1%  |
| b2237 | - | <i>inaA</i> | conserved protein                                                              | 100.0% |
| b2269 | + | <i>elaD</i> | predicted enzyme                                                               | 27.3%  |
| b2273 | - | <i>yfbN</i> | predicted protein                                                              | 9.1%   |
| b2274 | + | <i>yfbO</i> | predicted protein                                                              | 9.1%   |
| b2275 | + | <i>yfbP</i> | predicted protein                                                              | 9.1%   |
| b2301 | - | <i>yfcF</i> | predicted enzyme                                                               | 97.7%  |
| b2332 | - | <i>yfcO</i> | predicted protein                                                              | 6.8%   |
| b2334 | - | <i>yfcQ</i> | predicted fimbrial-like adhesin protein                                        | 6.8%   |
| b2335 | - | <i>yfcR</i> | predicted fimbrial-like adhesin protein                                        | 6.8%   |
| b2339 | - | <i>yfcV</i> | predicted fimbrial-like adhesin protein                                        | 40.9%  |
| b2345 | + | <i>yfdF</i> | predicted protein                                                              | 9.1%   |
| b2347 | + | <i>yfdC</i> | predicted inner membrane protein                                               | 100.0% |
| b2349 | + | <i>intS</i> | CPS-53 (KpLE1) prophage; predicted prophage CPS-53 integrase                   | 54.5%  |
| b2350 | + | <i>yfdG</i> | CPS-53 (KpLE1) prophage; bactoprenol-linked glucose translocase (flippase)     | 6.8%   |
| b2351 | + | <i>yfdH</i> | CPS-53 (KpLE1) prophage; bactoprenol glucosyl transferase                      | 2.3%   |
| b2352 | + | <i>yfdI</i> | CPS-53 (KpLE1) prophage; predicted inner membrane protein                      | 2.3%   |
| b4501 | + | <i>torI</i> | response regulator inhibitor for tor operon                                    | 31.8%  |
| b2368 | - | <i>emrK</i> | EmrKY-TolC multidrug resistance efflux pump, membrane fusion protein component | 95.5%  |
| b2369 | + | <i>evgA</i> | DNA-binding response regulator in two-component regulatory system with EvgS    | 97.7%  |
| b2370 | + | <i>evgS</i> | hybrid sensory histidine kinase in two-component regulatory system with EvgA   | 95.5%  |
| b2371 | - | <i>yfdE</i> | predicted CoA-transferase, NAD(P)-binding                                      | 93.2%  |
| b2372 | - | <i>yfdV</i> | predicted transporter                                                          | 97.7%  |
| b2373 | - | <i>oxc</i>  | predicted oxalyl-CoA decarboxylase                                             | 97.7%  |
| b2374 | - | <i>frc</i>  | formyl-CoA transferase, NAD(P)-binding                                         | 100.0% |
| b2375 | - | <i>yfdX</i> | predicted protein                                                              | 100.0% |
| b2376 | + | <i>ypdI</i> | predicted lipoprotein involved in colanic acid biosynthesis                    | 63.6%  |
| b2408 | + | <i>yfeN</i> | conserved outer membrane protein                                               | 61.4%  |
| b2409 | - | <i>yfeR</i> | predicted DNA-binding transcriptional regulator                                | 86.4%  |
| b2427 | - | <i>yfeT</i> | predicted DNA-binding transcriptional regulator                                | 68.2%  |
| b2442 | + | <i>intZ</i> | CPZ-55 prophage; predicted integrase                                           | 4.5%   |
| b2443 | + | <i>yffL</i> | CPZ-55 prophage; predicted protein                                             | 2.3%   |
| b2444 | + | <i>yffM</i> | CPZ-55 prophage; predicted protein                                             | 2.3%   |
| b2445 | + | <i>yffN</i> | CPZ-55 prophage; predicted protein                                             | 2.3%   |
| b2446 | + | <i>yffO</i> | CPZ-55 prophage; predicted protein                                             | 2.3%   |
| b2447 | + | <i>yffP</i> | CPZ-55 prophage; predicted protein                                             | 2.3%   |
| b2448 | + | <i>yffQ</i> | CPZ-55 prophage; predicted protein                                             | 2.3%   |
| b2449 | + | <i>yffR</i> | CPZ-55 prophage; predicted protein                                             | 2.3%   |
| b2450 | + | <i>yffS</i> | CPZ-55 prophage; predicted protein                                             | 2.3%   |
| b2466 | - | <i>ypfG</i> | predicted protein                                                              | 100.0% |
| b4606 | - | <i>ypfM</i> | hypothetical protein                                                           | 2.3%   |
| b2481 | + | <i>hyfA</i> | hydrogenase 4, 4Fe-4S subunit                                                  | 68.2%  |
| b2482 | + | <i>hyfB</i> | hydrogenase 4, membrane subunit                                                | 59.1%  |
| b2483 | + | <i>hyfC</i> | hydrogenase 4, membrane subunit                                                | 63.6%  |
| b2484 | + | <i>hyfD</i> | hydrogenase 4, membrane subunit                                                | 54.5%  |
| b2485 | + | <i>hyfE</i> | hydrogenase 4, membrane subunit                                                | 68.2%  |
| b2486 | + | <i>hyfF</i> | hydrogenase 4, membrane subunit                                                | 61.4%  |
| b2488 | + | <i>hyfH</i> | hydrogenase 4, Fe-S subunit                                                    | 65.9%  |
| b2489 | + | <i>hyfI</i> | hydrogenase 4, Fe-S subunit                                                    | 59.1%  |
| b2490 | + | <i>hyfJ</i> | predicted processing element hydrogenase 4                                     | 68.2%  |
| b2491 | + | <i>hyfR</i> | DNA-binding transcriptional activator, formate sensing                         | 63.6%  |
| b2492 | + | <i>focB</i> | predicted formate transporter                                                  | 65.9%  |
| b2537 | - | <i>hcaR</i> | DNA-binding transcriptional activator of 3-phenylpropionic acid catabolism     | 68.2%  |
| b2538 | + | <i>hcaE</i> | 3-phenylpropionate dioxygenase, large (alpha) subunit                          | 63.6%  |
| b2539 | + | <i>hcaF</i> | 3-phenylpropionate dioxygenase, small (beta) subunit                           | 65.9%  |
| b2540 | + | <i>hcaC</i> | 3-phenylpropionate dioxygenase, predicted ferredoxin subunit                   | 68.2%  |
| b2541 | + | <i>hcaB</i> | 2,3-dihydroxy-2,3-dihydrophenylpropionate dehydrogenase                        | 68.2%  |
| b2542 | + | <i>hcaD</i> | phenylpropionate dioxygenase, ferredoxin reductase subunit                     | 65.9%  |
| b2622 | + | <i>intA</i> | CP4-57 prophage; integrase                                                     | 2.3%   |
| b2623 | - | <i>yfhH</i> | CP4-57 prophage; predicted protein                                             | 2.3%   |
| b2624 | + | <i>alpA</i> | CP4-57 prophage; DNA-binding transcriptional activator                         | 2.3%   |
| b2625 | + | <i>yfhI</i> | CP4-57 prophage; predicted protein                                             | 2.3%   |
| b2626 | + | <i>yfhJ</i> | CP4-57 prophage; predicted protein                                             | 4.5%   |
| b2627 | - | <i>yfhK</i> | CP4-57 prophage; conserved protein                                             | 2.3%   |
| b2628 | - | <i>yfhL</i> | CP4-57 prophage; predicted protein                                             | 2.3%   |
| b2629 | - | <i>yfhM</i> | CP4-57 prophage; predicted protein                                             | 2.3%   |
| b2630 | + | <i>rmlA</i> | CP4-57 prophage; RNase LS                                                      | 2.3%   |
| b2631 | + | <i>yfhO</i> | CP4-57 prophage; predicted protein                                             | 2.3%   |
| b2632 | + | <i>yfhP</i> | CP4-57 prophage; predicted GTP-binding protein                                 | 2.3%   |
| b2634 | + | <i>yfhR</i> | CP4-57 prophage; predicted DNA-binding transcriptional regulator               | 4.5%   |
| b2635 | + | <i>yphK</i> | CP4-57 prophage; predicted inner membrane protein                              | 2.3%   |

|       |   |             |                                                                                               |        |
|-------|---|-------------|-----------------------------------------------------------------------------------------------|--------|
| b2636 | + | <i>yjS</i>  | CP4-57 prophage; predicted protein                                                            | 4.5%   |
| b2637 | + | <i>yjT</i>  | CP4-57 prophage; predicted protein                                                            | 2.3%   |
| b2642 | + | <i>yjW</i>  | CP4-57 prophage; predicted inner membrane protein                                             | 2.3%   |
| b2643 | + | <i>yjX</i>  | CP4-57 prophage; predicted antirestriction protein                                            | 2.3%   |
| b2644 | + | <i>yjY</i>  | CP4-57 prophage; predicted DNA repair protein                                                 | 4.5%   |
| b4548 | + | <i>ypjJ</i> | predicted protein                                                                             | 2.3%   |
| b2645 | + | <i>yjZ</i>  | CP4-57 prophage; antitoxin of the YpjF-YfjZ toxin-antitoxin system                            | 2.3%   |
| b2646 | + | <i>ypjF</i> | CP4-57 prophage; toxin of the YpjF-YfjZ toxin-antitoxin system                                | 2.3%   |
| b2665 | - | <i>ygaU</i> | predicted protein                                                                             | 100.0% |
| b2714 | - | <i>ascG</i> | DNA-binding transcriptional repressor                                                         | 86.4%  |
| b2715 | + | <i>ascF</i> | fused cellobiose/arbutin/salicin-specific PTS enzymes: IIB component/IC component             | 84.1%  |
| b2716 | + | <i>ascB</i> | cryptic 6-phospho-beta-glucosidase                                                            | 86.4%  |
| b2756 | - | <i>ygcH</i> | predicted protein                                                                             | 11.4%  |
| b2757 | - | <i>ygcl</i> | predicted protein                                                                             | 11.4%  |
| b2758 | - | <i>ygcJ</i> | predicted protein                                                                             | 11.4%  |
| b2759 | - | <i>ygcK</i> | predicted protein                                                                             | 11.4%  |
| b2760 | - | <i>ygcl</i> | predicted protein                                                                             | 11.4%  |
| b2761 | - | <i>ygcb</i> | conserved protein, member of DEAD box family                                                  | 9.1%   |
| b2782 | - | <i>chpA</i> | toxin of the ChpA-ChpR toxin-antitoxin system, endoribonuclease                               | 86.4%  |
| b2783 | - | <i>chpR</i> | antitoxin of the ChpA-ChpR toxin-antitoxin system                                             | 84.1%  |
| b2787 | - | <i>gudD</i> | (D)-glucarate dehydratase 1                                                                   | 100.0% |
| b2788 | - | <i>gudX</i> | predicted glucarate dehydratase                                                               | 86.4%  |
| b2789 | - | <i>gudP</i> | predicted D-glucarate transporter                                                             | 100.0% |
| b2842 | - | <i>kduD</i> | 2-deoxy-D-gluconate 3-dehydrogenase                                                           | 100.0% |
| b2843 | - | <i>kduL</i> | predicted 5-keto 4-deoxyuronate isomerase                                                     | 100.0% |
| b2848 | + | <i>yqeJ</i> | predicted protein                                                                             | 61.4%  |
| b2849 | - | <i>yqeK</i> | predicted protein                                                                             | 40.9%  |
| b2852 | + | <i>ygeH</i> | predicted transcriptional regulator                                                           | 59.1%  |
| b2853 | + | <i>ygeI</i> | predicted protein                                                                             | 40.9%  |
| b2902 | - | <i>ygfF</i> | predicted NAD(P)-binding oxidoreductase with NAD(P)-binding Rossmann-fold domain              | 40.9%  |
| b3002 | - | <i>yqhA</i> | conserved inner membrane protein                                                              | 97.7%  |
| b3003 | + | <i>yghA</i> | predicted glutathionylspermidine synthase, with NAD(P)-binding Rossmann-fold domain           | 100.0% |
| b3021 | - | <i>ygiT</i> | predicted DNA-binding transcriptional regulator                                               | 22.7%  |
| b3022 | - | <i>mqsR</i> | predicted cyanide hydratase                                                                   | 20.5%  |
| b3027 | - | <i>ygiZ</i> | conserved inner membrane protein                                                              | 54.5%  |
| b3043 | + | <i>ygiL</i> | predicted fimbrial-like adhesin protein                                                       | 43.2%  |
| b3047 | + | <i>yqiH</i> | predicted periplasmic pilin chaperone                                                         | 43.2%  |
| b3048 | + | <i>yqiI</i> | conserved protein                                                                             | 38.6%  |
| b3072 | - | <i>aer</i>  | fused signal transducer for aerotaxis sensory component/methyl accepting chemotaxis component | 97.7%  |
| b3104 | + | <i>yhaI</i> | predicted inner membrane protein                                                              | 31.8%  |
| b3119 | + | <i>tdcR</i> | DNA-binding transcriptional activator                                                         | 93.2%  |
| b3120 | + | <i>yhaB</i> | predicted protein                                                                             | 68.2%  |
| b3121 | + | <i>yhaC</i> | predicted protein                                                                             | 36.4%  |
| b3142 | + | <i>yraH</i> | predicted fimbrial-like adhesin protein                                                       | 56.8%  |
| b3143 | + | <i>yraI</i> | predicted periplasmic pilin chaperone                                                         | 54.5%  |
| b3144 | + | <i>yraJ</i> | predicted outer membrane protein                                                              | 52.3%  |
| b3145 | + | <i>yraK</i> | predicted fimbrial-like adhesin protein                                                       | 43.2%  |
| b3151 | - | <i>yraQ</i> | predicted permease                                                                            | 97.7%  |
| b3153 | + | <i>yhbO</i> | predicted intracellular protease                                                              | 88.6%  |
| b3173 | - | <i>yhbX</i> | predicted hydrolase, inner membrane                                                           | 95.5%  |
| b3214 | + | <i>gltF</i> | periplasmic protein                                                                           | 4.5%   |
| b3215 | + | <i>yhcA</i> | predicted periplasmic chaperone protein                                                       | 4.5%   |
| b3216 | + | <i>yhcD</i> | predicted outer membrane protein                                                              | 4.5%   |
| b3219 | + | <i>yhcF</i> | predicted transcriptional regulator                                                           | 4.5%   |
| b3227 | + | <i>dcuD</i> | predicted transporter                                                                         | 52.3%  |
| b3269 | + | <i>yhdX</i> | predicted amino-acid transporter subunit                                                      | 97.7%  |
| b3270 | + | <i>yhdY</i> | predicted amino-acid transporter subunit                                                      | 95.5%  |
| b3271 | + | <i>yhdZ</i> | predicted amino-acid transporter subunit                                                      | 100.0% |
| b3322 | - | <i>gspB</i> | part of gsp divergon involved in type II protein secretion                                    | 43.2%  |
| b3323 | - | <i>gspA</i> | general secretory pathway component, cryptic                                                  | 38.6%  |
| b3324 | + | <i>gspC</i> | general secretory pathway component, cryptic                                                  | 45.5%  |
| b3325 | + | <i>gspD</i> | general secretory pathway component, cryptic                                                  | 45.5%  |
| b3326 | + | <i>gspE</i> | general secretory pathway component, cryptic                                                  | 45.5%  |
| b3327 | + | <i>gspF</i> | general secretory pathway component, cryptic                                                  | 43.2%  |
| b3328 | + | <i>gspG</i> | pseudopilin, cryptic, general secretion pathway                                               | 45.5%  |
| b3330 | + | <i>gspI</i> | general secretory pathway component, cryptic                                                  | 43.2%  |
| b3331 | + | <i>gspJ</i> | predicted general secretory pathway component, cryptic                                        | 45.5%  |
| b3332 | + | <i>gspK</i> | general secretory pathway component, cryptic                                                  | 40.9%  |
| b3333 | + | <i>gspL</i> | general secretory pathway component, cryptic                                                  | 43.2%  |
| b3335 | + | <i>gspO</i> | bifunctional prepilin leader peptidase/ methylase                                             | 36.4%  |
| b3338 | - | <i>chiA</i> | periplasmic endochitinase                                                                     | 45.5%  |
| b3370 | + | <i>frlA</i> | predicted fructoselysine transporter                                                          | 59.1%  |
| b3371 | + | <i>frlB</i> | fructoselysine-6-P-deglycase                                                                  | 59.1%  |
| b4474 | + | <i>frlC</i> | predicted isomerase                                                                           | 59.1%  |

|       |   |             |                                                                                      |        |
|-------|---|-------------|--------------------------------------------------------------------------------------|--------|
| b3374 | + | <i>frlD</i> | fructoselysine 6-kinase                                                              | 43.2%  |
| b3375 | + | <i>frlR</i> | predicted DNA-binding transcriptional regulator                                      | 59.1%  |
| b3402 | - | <i>yhgE</i> | predicted inner membrane protein                                                     | 100.0% |
| b3442 | + | <i>yhhZ</i> | conserved protein                                                                    | 59.1%  |
| b3444 | + | <i>insA</i> | KpLE2 phage-like element; IS1 repressor protein InsA                                 | 27.3%  |
| b3445 | + | <i>insB</i> | IS1 transposase InsAB'                                                               | 75.0%  |
| b4612 | + | <i>yrhD</i> | hypothetical protein                                                                 | 9.1%   |
| b3446 | + | <i>yrhB</i> | predicted protein                                                                    | 65.9%  |
| b3448 | + | <i>yhhA</i> | conserved protein                                                                    | 100.0% |
| b3483 | + | <i>yhhH</i> | predicted protein                                                                    | 29.5%  |
| b3488 | - | <i>yhiJ</i> | predicted protein                                                                    | 54.5%  |
| b3501 | + | <i>arsR</i> | DNA-binding transcriptional repressor                                                | 63.6%  |
| b3502 | + | <i>arsB</i> | arsenite/antimonite transporter                                                      | 68.2%  |
| b3503 | + | <i>arsC</i> | arsenate reductase                                                                   | 100.0% |
| b3505 | - | <i>insH</i> | IS5 transposase and trans-activator                                                  | 27.3%  |
| b3508 | - | <i>yhiD</i> | predicted Mg(2+) transport ATPase inner membrane protein                             | 100.0% |
| b3524 | - | <i>yhjG</i> | predicted outer membrane biogenesis protein                                          | 100.0% |
| b3557 | + | <i>insJ</i> | IS150 protein InsA                                                                   | 22.7%  |
| b3558 | + | <i>insK</i> | IS150 conserved protein InsB                                                         | 22.7%  |
| b3562 | - | <i>yiaA</i> | conserved inner membrane protein                                                     | 97.7%  |
| b3564 | - | <i>xylB</i> | xylulokinase                                                                         | 97.7%  |
| b3565 | - | <i>xylA</i> | D-xylose isomerase                                                                   | 97.7%  |
| b3566 | + | <i>xylF</i> | D-xylose transporter subunit                                                         | 97.7%  |
| b3567 | + | <i>xylG</i> | fused D-xylose transporter subunits of ABC superfamily: ATP-binding components       | 97.7%  |
| b3568 | + | <i>xylH</i> | D-xylose transporter subunit                                                         | 100.0% |
| b3569 | + | <i>xylR</i> | DNA-binding transcriptional activator, xylose-binding                                | 97.7%  |
| b3584 | - | <i>yiaT</i> | predicted protein                                                                    | 63.6%  |
| b3585 | + | <i>yiaU</i> | predicted DNA-binding transcriptional regulator                                      | 65.9%  |
| b3594 | + | <i>yibA</i> | lyase containing HEAT-repeat                                                         | 36.4%  |
| b3618 | - | <i>htrL</i> | predicted protein                                                                    | 45.5%  |
| b3622 | + | <i>rfaL</i> | O-antigen ligase                                                                     | 4.5%   |
| b3623 | - | <i>waaU</i> | lipopolysaccharide core biosynthesis                                                 | 4.5%   |
| b3629 | - | <i>rfaS</i> | lipopolysaccharide core biosynthesis protein                                         | 6.8%   |
| b3645 | + | <i>dinD</i> | DNA-damage-inducible protein                                                         | 11.4%  |
| b3656 | - | <i>yicI</i> | predicted alpha-glucosidase                                                          | 97.7%  |
| b3657 | - | <i>yicJ</i> | predicted transporter                                                                | 97.7%  |
| b3662 | - | <i>nepl</i> | predicted transporter                                                                | 97.7%  |
| b4618 | + | <i>tisB</i> | lexA-regulated toxic peptide                                                         | 20.5%  |
| b3696 | + | <i>yidX</i> | predicted lipoproteinC                                                               | 59.1%  |
| b4557 | + | <i>yidD</i> | predicted protein                                                                    | 47.7%  |
| b3716 | + | <i>cbxB</i> | predicted inner membrane protein                                                     | 70.5%  |
| b3718 | - | <i>yieK</i> | predicted 6-phosphogluconolactonase                                                  | 70.5%  |
| b3719 | - | <i>yieL</i> | predicted xylanase                                                                   | 65.9%  |
| b3720 | - | <i>bglH</i> | carbohydrate-specific outer membrane porin, cryptic                                  | 70.5%  |
| b3721 | - | <i>bglB</i> | cryptic phospho-beta-glucosidase B                                                   | 72.7%  |
| b3722 | - | <i>bglF</i> | fused beta-glucoside-specific PTS enzymes: IIA component/IIB component/IIC component | 68.2%  |
| b3723 | - | <i>bglG</i> | transcriptional antiterminator of the bgl operon                                     | 63.6%  |
| b3824 | - | <i>rhtB</i> | neutral amino-acid efflux system                                                     | 97.7%  |
| b3861 | + | <i>yihF</i> | conserved protein                                                                    | 97.7%  |
| b3889 | + | <i>yiiE</i> | predicted transcriptional regulator                                                  | 88.6%  |
| b3890 | + | <i>yiiF</i> | conserved protein                                                                    | 40.9%  |
| b3897 | - | <i>frvR</i> | predicted regulator                                                                  | 68.2%  |
| b3898 | - | <i>frvX</i> | predicted endo-1,4-beta-glucanase                                                    | 68.2%  |
| b3899 | - | <i>frvB</i> | fused predicted PTS enzymes: IIB component/IIC component                             | 68.2%  |
| b3900 | - | <i>frvA</i> | predicted enzyme IIA component of PTS                                                | 68.2%  |
| b3901 | - | <i>rhaM</i> | L-rhamnose mutarotase                                                                | 97.7%  |
| b3902 | - | <i>rhaD</i> | rhamnulose-1-phosphate aldolase                                                      | 100.0% |
| b3903 | - | <i>rhaA</i> | L-rhamnose isomerase                                                                 | 100.0% |
| b3904 | - | <i>rhaB</i> | rhamnulokinase                                                                       | 97.7%  |
| b3905 | + | <i>rhaS</i> | DNA-binding transcriptional activator, L-rhamnose-binding                            | 97.7%  |
| b3906 | + | <i>rhaR</i> | DNA-binding transcriptional activator, L-rhamnose-binding                            | 97.7%  |
| b3907 | - | <i>rhaT</i> | L-rhamnose:proton symporter                                                          | 90.9%  |
| b3909 | + | <i>kdgT</i> | 2-keto-3-deoxy-D-gluconate transporter                                               | 97.7%  |
| b3989 | + | <i>yjaZ</i> | heat shock protein                                                                   | 36.4%  |
| b4011 | + | <i>yjaA</i> | conserved protein                                                                    | 38.6%  |
| b4017 | - | <i>arpA</i> | ankyrin repeat protein, function unknown                                             | 20.5%  |
| b4026 | + | <i>yjbE</i> | predicted protein                                                                    | 68.2%  |
| b4027 | + | <i>yjbF</i> | predicted lipoprotein                                                                | 100.0% |
| b4028 | + | <i>yjbG</i> | conserved protein                                                                    | 100.0% |
| b4029 | + | <i>yjbH</i> | predicted porin                                                                      | 100.0% |
| b4620 | - | <i>yjbT</i> | hypothetical protein, no homologs                                                    | 50.0%  |
| b4031 | - | <i>xylE</i> | D-xylose transporter                                                                 | 56.8%  |
| b4047 | + | <i>yjbL</i> | predicted protein                                                                    | 22.7%  |
| b4048 | + | <i>yjbM</i> | predicted protein                                                                    | 18.2%  |

|       |   |             |                                                                                          |        |
|-------|---|-------------|------------------------------------------------------------------------------------------|--------|
| b4621 | - | <i>yjBS</i> | hypothetical protein                                                                     | 2.3%   |
| b4066 | - | <i>yjCF</i> | conserved protein                                                                        | 47.7%  |
| b4084 | - | <i>alsK</i> | D-allose kinase                                                                          | 56.8%  |
| b4085 | - | <i>alsE</i> | allulose-6-phosphate 3-epimerase                                                         | 56.8%  |
| b4086 | - | <i>alsC</i> | D-allose transporter subunit                                                             | 45.5%  |
| b4087 | - | <i>alsA</i> | fused D-allose transporter subunits of ABC superfamily: ATP-binding components           | 54.5%  |
| b4088 | - | <i>alsB</i> | D-allose transporter subunit                                                             | 56.8%  |
| b4089 | - | <i>rpiR</i> | DNA-binding transcriptional repressor                                                    | 56.8%  |
| b4090 | + | <i>rpiB</i> | ribose 5-phosphate isomerase B/allose 6-phosphate isomerase                              | 56.8%  |
| b4092 | - | <i>phnP</i> | carbon-phosphorus lyase complex accessory protein                                        | 100.0% |
| b4093 | - | <i>phnO</i> | predicted acyltransferase with acyl-CoA N-acyltransferase domain                         | 97.7%  |
| b4094 | - | <i>phnN</i> | ribose 1,5-bisphosphokinase                                                              | 97.7%  |
| b4095 | - | <i>phnM</i> | carbon-phosphorus lyase complex subunit                                                  | 100.0% |
| b4096 | - | <i>phnL</i> | carbon-phosphorus lyase complex subunit                                                  | 100.0% |
| b4097 | - | <i>phnK</i> | carbon-phosphorus lyase complex subunit                                                  | 100.0% |
| b4098 | - | <i>phnJ</i> | carbon-phosphorus lyase complex subunit                                                  | 95.5%  |
| b4099 | - | <i>phnI</i> | carbon-phosphorus lyase complex subunit                                                  | 97.7%  |
| b4100 | - | <i>phnH</i> | carbon-phosphorus lyase complex subunit                                                  | 100.0% |
| b4101 | - | <i>phnG</i> | carbon-phosphorus lyase complex subunit                                                  | 100.0% |
| b4102 | - | <i>phnF</i> | predicted DNA-binding transcriptional regulator of phosphonate uptake and biodegradation | 100.0% |
| b4105 | - | <i>phnD</i> | phosphonate/organophosphate ester transporter subunit                                    | 100.0% |
| b4106 | - | <i>phnC</i> | phosphonate/organophosphate ester transporter subunit                                    | 97.7%  |
| b4109 | + | <i>yjDA</i> | conserved protein with nucleoside triphosphate hydrolase domain                          | 97.7%  |
| b4110 | + | <i>yjCZ</i> | conserved protein                                                                        | 100.0% |
| b4118 | - | <i>melR</i> | DNA-binding transcriptional dual regulator                                               | 100.0% |
| b4119 | + | <i>melA</i> | alpha-galactosidase, NAD(P)-binding                                                      | 100.0% |
| b4120 | + | <i>melB</i> | melibiose:sodium symporter                                                               | 65.9%  |
| b4128 | + | <i>yjDK</i> | predicted protein                                                                        | 86.4%  |
| b4204 | - | <i>yjFZ</i> | predicted protein                                                                        | 47.7%  |
| b4211 | - | <i>yjFG</i> | NAD(P)H:quinone oxidoreductase                                                           | 100.0% |
| b4212 | + | <i>yjFH</i> | predicted transcriptional regulator                                                      | 100.0% |
| b4215 | + | <i>yjFI</i> | predicted protein                                                                        | 20.5%  |
| b4224 | + | <i>chpS</i> | antitoxin of the ChpB-ChpS toxin-antitoxin system                                        | 59.1%  |
| b4225 | + | <i>chpB</i> | toxin of the ChpB-ChpS toxin-antitoxin system                                            | 59.1%  |
| b4248 | - | <i>yjGH</i> | predicted mRNA endoribonuclease                                                          | 68.2%  |
| b4249 | - | <i>yjGI</i> | predicted oxidoreductase with NAD(P)-binding Rossmann-fold domain                        | 70.5%  |
| b4251 | + | <i>yjGJ</i> | predicted transcriptional regulator                                                      | 63.6%  |
| b4253 | + | <i>yjGL</i> | predicted protein                                                                        | 2.3%   |
| b4257 | + | <i>yjGN</i> | conserved inner membrane protein                                                         | 61.4%  |
| b4264 | - | <i>idnR</i> | DNA-binding transcriptional repressor, 5-gluconate-binding                               | 54.5%  |
| b4265 | - | <i>idnT</i> | L-idonate and D-gluconate transporter                                                    | 52.3%  |
| b4266 | - | <i>idnO</i> | 5-keto-D-gluconate-5-reductase                                                           | 54.5%  |
| b4267 | - | <i>idnD</i> | L-idonate 5-dehydrogenase, NAD-binding                                                   | 54.5%  |
| b4268 | + | <i>idnK</i> | D-gluconate kinase, thermosensitive                                                      | 52.3%  |
| b4272 | + | <i>insC</i> | KpLE2 phage-like element; IS2 insertion element repressor InsA                           | 50.0%  |
| b4273 | + | <i>insD</i> | KpLE2 phage-like element; IS2 insertion element transposase InsAB'                       | 50.0%  |
| b4277 | + | <i>yjGZ</i> | KpLE2 phage-like element; predicted protein                                              | 6.8%   |
| b4278 | - | <i>insG</i> | KpLE2 phage-like element; IS4 predicted transposase                                      | 18.2%  |
| b4279 | + | <i>yjHB</i> | KpLE2 phage-like element; predicted transporter                                          | 13.6%  |
| b4280 | + | <i>yjHC</i> | KpLE2 phage-like element; predicted oxidoreductase                                       | 11.4%  |
| b4655 | + | <i>yjHA</i> | expressed protein                                                                        | 4.5%   |
| b4284 | - | <i>insI</i> | KpLE2 phage-like element; IS30 transposase                                               | 50.0%  |
| b4287 | - | <i>fecE</i> | KpLE2 phage-like element; iron-dicitrate transporter subunit                             | 40.9%  |
| b4288 | - | <i>fecD</i> | KpLE2 phage-like element; iron-dicitrate transporter subunit                             | 43.2%  |
| b4289 | - | <i>fecC</i> | KpLE2 phage-like element; iron-dicitrate transporter subunit                             | 45.5%  |
| b4290 | - | <i>fecB</i> | KpLE2 phage-like element; iron-dicitrate transporter subunit                             | 45.5%  |
| b4291 | - | <i>fecA</i> | KpLE2 phage-like element; ferric citrate outer membrane transporter                      | 45.5%  |
| b4292 | - | <i>fecR</i> | KpLE2 phage-like element; transmembrane signal transducer for ferric citrate transport   | 45.5%  |
| b4293 | - | <i>fecI</i> | KpLE2 phage-like element; RNA polymerase, sigma 19 factor                                | 45.5%  |
| b4294 | + | <i>insA</i> | KpLE2 phage-like element; IS1 repressor protein InsA                                     | 52.3%  |
| b4295 | - | <i>yjHU</i> | KpLE2 phage-like element; predicted DNA-binding transcriptional regulator                | 13.6%  |
| b4296 | - | <i>yjHF</i> | KpLE2 phage-like element; predicted transporter                                          | 13.6%  |
| b4297 | - | <i>yjHG</i> | KpLE2 phage-like element; predicted dehydratase                                          | 13.6%  |
| b4298 | - | <i>yjHH</i> | KpLE2 phage-like element; predicted lyase/synthase                                       | 13.6%  |
| b4299 | - | <i>yjHI</i> | KpLE2 phage-like element; predicted DNA-binding transcriptional regulator                | 13.6%  |
| b4300 | - | <i>sgcR</i> | KpLE2 phage-like element; predicted DNA-binding transcriptional regulator                | 13.6%  |
| b4301 | - | <i>sgcE</i> | KpLE2 phage-like element; predicted epimerase                                            | 13.6%  |
| b4302 | - | <i>sgcA</i> | KpLE2 phage-like element; predicted phosphotransferase enzyme IIA component              | 13.6%  |
| b4303 | - | <i>sgcQ</i> | KpLE2 phage-like element; predicted nucleoside triphosphatase                            | 13.6%  |
| b4304 | - | <i>sgcC</i> | KpLE2 phage-like element; predicted phosphotransferase enzyme IIC component              | 13.6%  |
| b4565 | - | <i>sgcB</i> | predicted enzyme IIB component of PTS                                                    | 13.6%  |
| b4305 | - | <i>sgcX</i> | KpLE2 phage-like element; predicted endoglucanase with Zn-dependent exopeptidase domain  | 13.6%  |
| b4306 | - | <i>yjHP</i> | KpLE2 phage-like element; predicted methyltransferase                                    | 15.9%  |
| b4307 | - | <i>yjHQ</i> | KpLE2 phage-like element; predicted acetyltransferase                                    | 15.9%  |

|       |   |             |                                                                                  |       |
|-------|---|-------------|----------------------------------------------------------------------------------|-------|
| b4566 | - | <i>yjhX</i> | conserved protein                                                                | 15.9% |
| b4309 | - | <i>yjhS</i> | conserved protein                                                                | 81.8% |
| b4311 | - | <i>nanC</i> | N-acetylnuraminic acid outer membrane channel protein                            | 84.1% |
| b4325 | - | <i>yjiC</i> | predicted protein                                                                | 65.9% |
| b4327 | - | <i>yjiE</i> | predicted DNA-binding transcriptional regulator                                  | 86.4% |
| b4331 | + | <i>kptA</i> | 2'-phosphotransferase                                                            | 65.9% |
| b4332 | - | <i>yjiJ</i> | predicted inner membrane protein                                                 | 54.5% |
| b4333 | - | <i>yjiK</i> | conserved protein                                                                | 75.0% |
| b4337 | - | <i>mdtM</i> | multidrug efflux system protein                                                  | 70.5% |
| b4340 | - | <i>yjiR</i> | fused predicted DNA-binding transcriptional regulator/predicted aminotransferase | 59.1% |
| b4341 | + | <i>yjiS</i> | conserved protein                                                                | 52.3% |
| b4345 | - | <i>mcrC</i> | 5-methylcytosine-specific restriction enzyme McrBC, subunit McrC                 | 4.5%  |
| b4346 | - | <i>mcrB</i> | 5-methylcytosine-specific restriction enzyme McrBC, subunit McrB                 | 4.5%  |
| b4348 | - | <i>hsdS</i> | specificity determinant for hsdM and hsdR                                        | 4.5%  |
| b4351 | + | <i>mrr</i>  | methylated adenine and cytosine restriction protein                              | 13.6% |
| b4355 | + | <i>tsr</i>  | methyl-accepting chemotaxis protein I, serine sensor receptor                    | 97.7% |
| b4385 | + | <i>yjiJ</i> | predicted DNA-binding transcriptional regulator                                  | 29.5% |

The 680 of K-12 genes that are absent in all of the three completely sequenced *E. albertii* strains are listed. Among these, 88 genes that are conserved in more than 36 strains out of the 44 fully sequenced *E. coli* strains (>80%) are indicated in blue or red. The genes indicated in red are conserved in all 44 *E. coli* strains and absent in all 34 *E. albertii* strains. Gene clusters discussed in the main text were highlighted.
